# 1 The genomics of linkage drag in sunflower

2  
3 Kaichi Huang<sup>a,1\*</sup>, Mojtaba Jahani<sup>a,1</sup>, Jérôme Gouzy<sup>b</sup>, Alexandra Legendre<sup>b</sup>, Sebastien  
4 Carrere<sup>b</sup>, José Miguel Lázaro-Guevara<sup>a</sup>, Eric Gerardo González Segovia<sup>a</sup>, Marco  
5 Todesco<sup>a</sup>, Baptiste Mayjonade<sup>b</sup>, Nathalie Rodde<sup>c</sup>, Stéphane Cauet<sup>c</sup>, Isabelle Dufau<sup>c</sup>, S  
6 Evan Staton<sup>a,d</sup>, Nicolas Pouilly<sup>b</sup>, Marie-Claude Boniface<sup>b</sup>, Camille Tapy<sup>b</sup>, Brigitte  
7 Mangin<sup>b</sup>, Alexandra Duhnen<sup>b</sup>, Véronique Gautier<sup>e</sup>, Charles Poncet<sup>e</sup>, Cécile Donnadiou<sup>f</sup>,  
8 Tali Mandel<sup>g</sup>, Sariel Hübner<sup>g</sup>, John M. Burke<sup>h</sup>, Sonia Vautrin<sup>c</sup>, Arnaud Bellec<sup>c</sup>, Gregory  
9 L. Owens<sup>i</sup>, Nicolas Langlade<sup>b,2</sup>, Stéphane Muñoz<sup>b,2</sup>, and Loren H. Rieseberg<sup>a,2\*</sup>

10  
11 **Author Affiliations:** <sup>a</sup>Department of Botany and Biodiversity Research Centre,  
12 University of British Columbia, Vancouver, BC, V6R 2A5, Canada; <sup>b</sup>Laboratoire des  
13 Interactions Plantes Microbes-Environnement (LIPME), CNRS, INRAE, Université de  
14 Toulouse, Castanet-Tolosan, France; <sup>c</sup>INRAE, CNRGV French Plant Genomic Resource  
15 Center, F-31320, Castanet-Tolosan, France; <sup>d</sup>NRGene Canada Inc., Saskatoon, SK, S7N  
16 3R3, Canada; <sup>e</sup>Gentyane Genomic Platform, INRAE, Clermont Ferrand, France;  
17 <sup>f</sup>GeT-PlaGe Genomic Platform, INRAE, Toulouse, France; <sup>g</sup>Galilee Research Institute  
18 (MIGAL), Tel-Hai Academic College, Upper Galilee, Israel; <sup>h</sup>Department of Plant  
19 Biology, University of Georgia, Athens, GA, 30602; <sup>i</sup>Department of Biology, University  
20 of Victoria, Victoria, BC, V8W 2Y2, Canada.

21  
22 <sup>1</sup>The authors contributed equally

23 <sup>2</sup>Joint senior authors

24 \*To whom correspondence may be addressed: Email: [kaichi.huang@botany.ubc.ca](mailto:kaichi.huang@botany.ubc.ca) or  
25 [lriesebe@mail.ubc.ca](mailto:lriesebe@mail.ubc.ca)

26  
27 **Keywords:** Introgression, Linkage Drag, Plant Breeding, Structural Variation, Sunflower

28 **Abstract**

29

30 Crop wild relatives represent valuable sources of alleles for crop improvement, including  
31 adaptation to climate change and emerging diseases. However, introgressions from wild  
32 relatives might have deleterious effects on desirable traits, including yield, due to linkage  
33 drag. Here we comprehensively analyzed the genomic and phenotypic impacts of wild  
34 introgressions into cultivated sunflower to estimate the impacts of linkage drag. First, we  
35 generated new reference sequences for seven cultivated and one wild sunflower  
36 genotype, as well as improved assemblies for two additional cultivars. Next, relying on  
37 previously generated sequences from wild donor species, we identified introgressions in  
38 the cultivated reference sequences, as well as the sequence and structural variants they  
39 contain. We then used a ridge regression model to test the effects of the introgressions on  
40 phenotypic traits in the cultivated sunflower association mapping population. We found  
41 that introgression has introduced substantial sequence and structural variation into the  
42 cultivated sunflower gene pool, including > 3,000 new genes. While introgressions  
43 reduced genetic load at protein-coding sequences and positively affected traits associated  
44 with abiotic stress resistance, they mostly had negative impacts on yield and quality  
45 traits. Introgressions found at high frequency in the cultivated gene pool had larger  
46 effects than low frequency introgressions, suggesting that the former likely were targeted  
47 by artificial selection. Also, introgressions from more distantly related species were more  
48 likely to be maladaptive than those from the wild progenitor of cultivated sunflower.  
49 Thus, pre-breeding efforts should focus, as far as possible, on closely related and fully  
50 compatible wild relatives.

51

## 52 **Introduction**

53

54 Domestication – the process that transformed wild plants into highly productive crops –  
55 is arguably the most important innovation in human history (Diamond 2002). Not only  
56 did it spark explosive population growth and the establishment of modern civilization  
57 (Diamond 1997), but it also laid the foundation for the theory of evolution (Darwin 1859)  
58 thereby unifying the life sciences (Dobzhansky 1973). While domestication and  
59 subsequent improvement have proven spectacularly successful in modifying plant  
60 architecture and enhancing yield (Evans 1993), such changes often come with a cost,  
61 including losses of genetic diversity (Tang and Knapp 2003; Khoury et al. 2022),  
62 increases in genetic load (Moyers et al. 2018), and reductions in resistance to biotic and  
63 abiotic stress (Smedegaard-Petersen and Tolstrup 1985; Mayrose et al. 2011). This is of  
64 increasing concern in the 21<sup>st</sup> century, as environmentally resilient cultivars are needed to  
65 cope with a more hostile climate, while minimizing use of costly external inputs such as  
66 fertilizer, pesticides, and water.

67

68 Fortunately, diversity lost during domestication and improvement may be regained by  
69 tapping the gene pools of crop wild relatives (CWRs). The potential utility of such wild  
70 germplasm has long been recognized by plant biologists and breeders (Harlan 1975;  
71 Tanksley and McCouch 1997; McCouch et al. 2013), leading to global efforts to collect  
72 and conserve CWRs, in addition to the crops themselves (Plucknett et al. 1987).  
73 Likewise, breeding programs often include a pre-breeding component, in which wild  
74 genetic material is introduced into domesticated breeding lines (Zamir 2001; Hübner  
75 and Kantar 2021). While many such efforts have focused on enhancing disease resistance  
76 (Dempewolf et al. 2017), CWRs also have been used to increase nutritional quality, boost  
77 yield, and enhance resistance to abiotic stressors, such as drought, salt, and flooding (Gur  
78 et al. 2004; Hajjar and Hodgkin 2007; Warschefsky et al. 2014; Hübner  
79 and Kantar 2021). Economic analyses have confirmed the value of such an approach. For  
80 example, a 2013 analysis of 32 crops estimated current benefits from CWR traits to be  
81 ~\$68 billion annually, with potential future benefits of ~\$196 billion annually  
82 (PricewaterhouseCoopers 2013).

83

84 Despite the clear value of CWR traits for crop improvement, there are downsides. The  
85 introduction of wild genetic material into cultivated lines typically occurs via repeated  
86 backcrossing or introgression (Tanksley and McCouch 1997). This process is not only  
87 time-consuming, but it also can be hampered by reproductive barriers that interfere with  
88 crosses or that reduce the fitness of hybrid offspring (Moyle and Graham 2005; Tao et al.  
89 2021). In addition, the resulting introgressions may have undesirable impacts on non-  
90 target crop traits (Chitwood-Brown et al. 2021). While this can be due to negative  
91 pleiotropic effects of the target alleles, adverse effects appear to be more frequently  
92 caused by linked alleles that are deleterious in the crop genetic background (Von fels et  
93 al. 2017; Chitwood-Brown et al. 2021), a phenomenon called linkage drag. Plant breeders  
94 typically monitor the size and location of introgressions with molecular markers and/or  
95 restrict pre-breeding efforts to fully compatible wild relatives (i.e., members of the  
96 primary gene pool; Harlan and de Wet 1971) to reduce the impact of the linkage drag

97 (Young and Tanksley 1989; Tanksley and McCouch 1997; Frary et al. 2004). However,  
98 in large plant genomes, regions of low recombination are widespread, making it difficult  
99 to reduce the sizes of some introgressions (Rodgers-Melnick et al. 2015; Brazier and  
100 Glémin 2022; Huang et al. 2022). Also, key traits may be found outside of the primary  
101 gene pool, making it necessary to tap less compatible wild relatives (e.g., Duriez et al.  
102 2019). The latter are classified as the secondary gene pool if they can intercross with the  
103 crop and produce at least some partially fertile hybrids (Harlan and de Wet 1971). More  
104 distantly related species that require technological interventions to produce hybrid  
105 offspring are referred to as the tertiary gene pool (Harlan and de Wet 1971).

106  
107 The causes of linkage drag are assumed to be like those that contribute to species  
108 differences in natural populations. These include the genetic changes responsible for  
109 phenotypic divergence, as well as various kinds of hybrid incompatibilities (Chitwood-  
110 Brown et al. 2021; Tao et al. 2021). Introgressions with strongly negative effects are  
111 likely purged by selection during pre-breeding, so those successfully incorporated into  
112 the cultivated gene pool should be less harmful. However, as far as we are aware, a  
113 comprehensive analysis of the effects of such introgressions on cultivated phenotypes has  
114 yet to be conducted. The genomic impacts of these introgressions are even less clear.  
115 Introgression has been shown to reduce genetic load in maize (Wang et al. 2017) and  
116 sorghum (Smith et al. 2019) and to introduce gene presence/absence polymorphisms in  
117 sunflower (Owens et al. 2019), thereby increasing the size of its pan-genome (Hübner et  
118 al. 2019). However, a definitive analysis of the genomic impacts of such introgressions  
119 requires generation and analyses of multiple high-quality reference genomes.

120  
121 Here we provide a comprehensive analysis of the phenotypic and genomic effects of  
122 linkage drag using sunflower as an experimental system. Crop wild relatives have been  
123 widely employed in sunflower breeding (Dempewolf et al. 2017; Seiler et al. 2017), and  
124 recent genomic studies have estimated that ca. 10% of the cultivated gene pool is derived  
125 from wild introgressions (Baute et al. 2015; Hübner et al. 2019). While most such  
126 introgressions are from wild *H. annuus*, the fully compatible progenitor of the cultivated  
127 sunflower, there are significant contributions from other species as well, making it  
128 feasible to compare the effects of introgression from the primary and secondary gene  
129 pools.

130  
131 To estimate the impacts of linkage drag, we first sequenced and assembled reference  
132 genomes for seven cultivated and one wild sunflower genotype and improved the  
133 assemblies for two previously sequenced cultivars (Badouin et al. 2017). Then, using  
134 resequencing data previously generated for a diverse panel of wild donor species (Hübner  
135 et al. 2019; Todesco et al. 2020), we identified introgressions in the cultivar genomes and  
136 examined their impacts on sequence and structural variation in the cultivated sunflower  
137 gene pool. Lastly, we determined the locations of introgressions in the cultivated  
138 sunflower association mapping (SAM) population (Mandel et al. 2011) and used a ridge  
139 regression model to estimate their effects on 16 phenotypic traits, including quality traits,  
140 such as oil percentage in seeds, developmental traits such as flowering time, and yield-  
141 related traits such as head weight.

142

143 As expected, we found that introgressions increased sequence and structural  
 144 polymorphism in the cultivated gene pool, reduced genetic load at protein-coding  
 145 sequences, and enhanced trait values associated with abiotic stress resistance. On the  
 146 other hand, introgressions typically reduced quality and yield traits. We also found that  
 147 higher frequency introgressions have larger effects than low frequency introgressions,  
 148 possibly indicating that the former have been targeted by artificial selection. Lastly,  
 149 introgressions from the secondary gene pool had much larger negative effects than those  
 150 from the primary gene pool. Thus, we encourage pre-breeding programs to focus as far as  
 151 possible on the primary gene pool.

152

## 153 Results

154

155 To identify SVs and introgressions in cultivated sunflowers, we constructed *de novo*  
 156 genome assemblies using PacBio sequencing for seven inbred cultivated lines and one  
 157 wild *H. annuus* genotype (Table 1; SI Appendix, Table S1; Dataset S1). Five of these  
 158 assemblies were further scaffolded using Bionano optical mapping. We also improved the  
 159 quality of previously sequenced assemblies (Badouin et al. 2017) for the HA412-HO  
 160 inbred line using Illumina, 10×, and Hi-C sequencing (Table S1) and for the XRQ inbred  
 161 line using the PacBio/Bionano combination described above. The nine cultivated lines  
 162 represent a large part of cultivated sunflower genetic diversity present in the world's  
 163 genebanks (Terzic et al. 2020; SI Appendix, Fig. S1)

164

165 **Table 1.** Description of new or improved reference genomes for sunflower (*H. annuus*).

| Genotype / version | Type                 | Sequencing technology                         | Sequence Depth <sup>1</sup> | Scaffolding technology  | N50 (Kb) | Assembly size (Kb) | Complete BUSCO Genes (%) |
|--------------------|----------------------|-----------------------------------------------|-----------------------------|-------------------------|----------|--------------------|--------------------------|
| HA412-HO v2        | Cultivar, maintainer | Illumina paired-end, mate pair & 10X Chromium | 251×                        | Hi-C Sequencing         | 187,414  | 3,226,370          | 97.9                     |
| XRQ v2             | Cultivar, maintainer | PacBio RSII, Illumina paired-end              | 172×                        | Bionano optical mapping | 176,491  | 3,010,048          | 97.4                     |
| PSC8 v1            | Cultivar, restorer   | PacBio RSII, Illumina paired-end              | 66×                         | Bionano optical mapping | 179,999  | 3,057,327          | 94.5                     |
| RHA438 v1          | Cultivar, restorer   | PacBio Sequel 2                               | 55×                         | Bionano optical mapping | 177,554  | 3,095,288          | 96.7                     |
| IR v1              | Cultivar, maintainer | PacBio Sequel 2                               | 60×                         | Bionano optical mapping | 179,325  | 3,047,956          | 97.1                     |
| HA89 v1            | Cultivar, maintainer | PacBio Sequel 2                               | 34×                         | Bionano optical mapping | 175,389  | 3,002,007          | 97.3                     |
| LR1 v0.9           | Cultivar, maintainer | PacBio Sequel 2                               | 13×                         | Reference-guided        | 174,126  | 3,154,038          | 85.9                     |
| OQP8 v0.9          | Cultivar, restorer   | PacBio Sequel 2                               | 13×                         | Reference-guided        | 177,187  | 3,119,769          | 88.1                     |
| HA300 v0.9         | Cultivar, maintainer | PacBio Sequel 2                               | 10×                         | Reference-guided        | 171,505  | 3,025,264          | 90.3                     |
| PI659440 v1        | Wild                 | PacBio Sequel 2                               | 41×                         | Bionano optical mapping | 181,076  | 3,162,322          | 96.5                     |

166

<sup>1</sup>Polished sequence data

167

168 All genomes were assembled into 17 pseudomolecules, corresponding to the 17  
169 chromosomes in sunflower. Each of our chromosome-level genome assemblies had a  
170 total size between 3,002 and 3,226 Mb, with N50 of 172-187 Mb (Table 1; Dataset S2).  
171 The total number of genes per genome, after stringent filtering, ranged from 44,640 for  
172 XRQv2 to 63,048 genes for HA300 (Table S5). The assemblies captured 85.9-97.9% of  
173 the universally conserved single-copy benchmark (BUSCO) genes (Table 1; SI  
174 Appendix, Table S4). BUSCO percentages were positively correlated with sequence  
175 depth rather than gene number, with the lowest BUSCO scores observed for LR1 and  
176 OQP8, which were sequenced to circa 13× depth, whereas the highest BUSCO scores  
177 were seen for HA412-HOv2 and XRQv2, which were sequenced to 251× depth and 172×  
178 depth, respectively (Table 1; Dataset S1). The genomes showed high collinearity without  
179 large inter-chromosomal translocations (SI Appendix, Figs. S2-S6). Overall, our  
180 chromosome-scale genome assemblies yielded better qualitative metrics than the two  
181 previously published reference assemblies (Badouin et al. 2017).

182  
183 In general, 74-83% of the genomes are composed of transposable elements (TEs), with  
184 70-73% of these being LTR-RTs (SI Appendix, Table S6). In agreement with previous  
185 studies of the cultivated sunflower genome (Staton et al. 2012), there is a major bias in  
186 TE composition towards *Gypsy* (50-60% of total TEs) and *Copia* (13-18% of total TEs)  
187 elements, while Class II TEs (DNA transposons) were much lower in abundance relative  
188 to LTR-RTs, comprising <13% of each genome (SI Appendix, Table S6). The genomic  
189 distributions of LTR-RTs in the new assemblies are similar to those previously reported  
190 for the first reference genomes for cultivated sunflower (Badouin et al. 2017; SI  
191 Appendix, Figs. S7-15).

192  
193 By mapping previously published whole-genome sequences (Hübner et al. 2019; Todesco  
194 et al. 2020) from native North American landraces (i.e., early domesticates) and five wild  
195 possible donor species to each genome assembly, we determined the ancestry of each  
196 cultivated line and estimated the locations and likely parentage of introgressions. Only a  
197 small portion (2-8%) of each genome was admixed (Fig. 1; SI Appendix, Fig. S16;  
198 Dataset S3), which is similar to previous estimates for the XRQ and HA412-HO genomes  
199 (Badouin et al. 2017). All cultivated genomes possessed more introgressions from the  
200 primary gene pool (primary introgressions) than those from the secondary gene pool  
201 (secondary introgressions).

202  
203 Sunflower is a hybrid crop, and crop wild relatives were used to develop cytoplasmic  
204 male sterile “female” lines and branching, fertility restoring “male” lines for hybrid  
205 production. The male restorer lines PSC8, OQP8, and RHA438 generally had more  
206 introgressions than the female maintainer lines (HA412, XRQ, IR, HA89, LR1, and  
207 HA300). Consistent with breeding records and previous findings (Gentzbittel et al. 1999;  
208 Baute et al. 2015; Vear 2016; Hübner et al. 2019), the restorer lines had substantial  
209 introgression from wild *H. annuus* on chr10, which underlies apical branching, as well as  
210 an introgression near the distal end of chr13, where the restorer of fertility locus (*Rfl*) of  
211 the common PET1 male sterile cytoplasm is located (Fig. 1). However, while the restorer  
212 allele in PSC8 and OQP8 was derived from *H. petiolaris* as expected (Leclercq 1969), an  
213 introgression from wild *H. annuus* was found in RHA438 at the region, suggesting

214 possible different origins of fertility restoration in cultivated sunflower. The majority  
215 (~68%) of the primary introgressions were unique to one genotype and only a small  
216 proportion (<0.1%) were shared across all nine genomes. Almost all secondary  
217 introgressions were unique to one genotype.

218  
219 We identified single nucleotide polymorphisms (SNPs) and small (<50bp)  
220 insertions/deletions (InDels), as well as different types of structural variants (SVs)  
221 including large (> 50 bp) InDels, copy number variants (CNVs), inversions, and  
222 translocations through the alignment of the high-contiguity cultivar genome assemblies  
223 (HA412-HOv2, XRQv2, PSC8, RHA438, IR, HA89). In total, we identified 12,036,913  
224 SNPs and 3,005,855 small InDels across 17 chromosomes using the HA412-HOv2  
225 genome as the reference (Fig. 1). We also detected 70,612-84,709 large InDels, 32,668-  
226 47,706 CNVs, 4,776-7,738 translocations, and 261-301 inversions (>1kb) between each  
227 genome and the HA412-HOv2 reference (Fig. 1; Dataset S4). After merging, 532  
228 polymorphic inversions with a total size of 200 Mb were identified across the cultivars,  
229 including a 21-Mb region (156-177Mb) on chr5 that corresponded to the largest section  
230 of a cluster of inversions previously identified in wild *Helianthus annuus* (Todesco et al.  
231 2020; Fig. 1J).

232

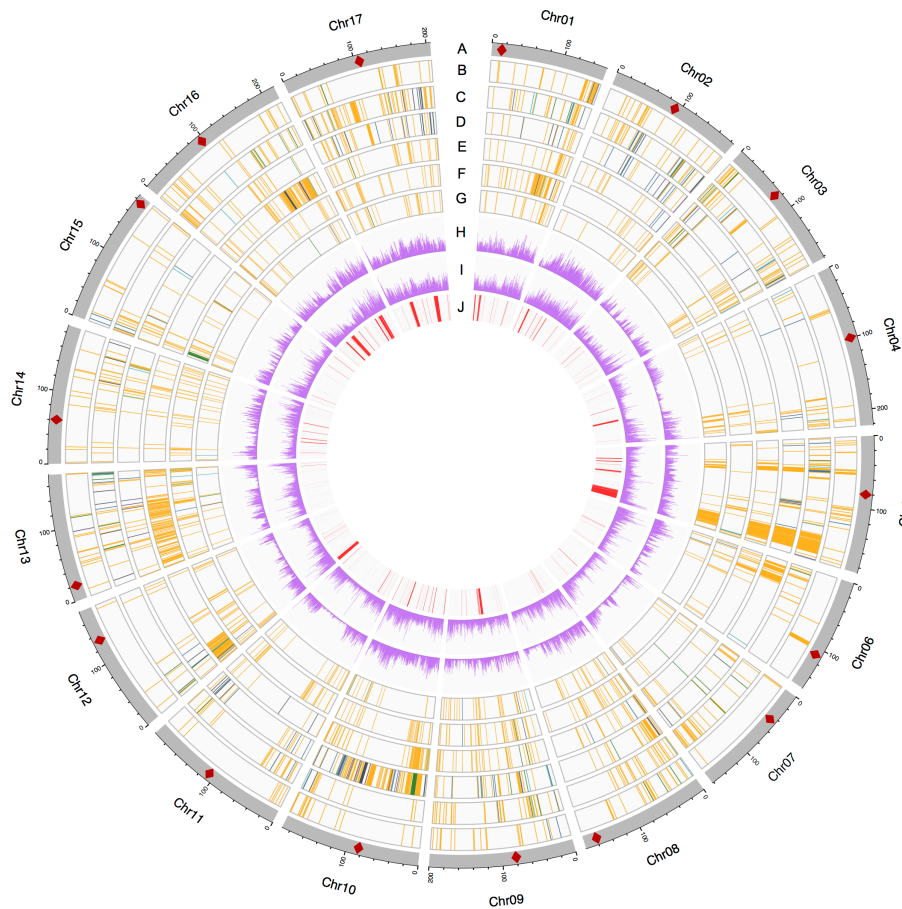

233  
234  
235  
236  
237  
238  
239  
240  
241  
242

**Fig. 1.** Introgressions and genetic variants of the high-contiguity cultivated sunflower genome assemblies. **A.** Chromosomes of the HA412-HOV2 reference. Diamonds mark approximate positions of centromeres. **B-G.** Introgressions in HA412-HO, XRQ, PSC8, RHA438, IR, and HA89 projected to the Ha412-HOV2 reference. Colored bars represent introgressions from different wild donors: orange: *Helianthus annuus*, green: *H. argophyllus*, light blue: *H. petiolaris* subsp. *petiolaris*, deep blue: *H. petiolaris* subsp. *fallax*, purple: *H. niveus* and dark grey: *H. debilis*. **H-I.** Density of SNPs (**H**) and small InDels (**I**) (number/500 kb; 0-10000 for SNPs and 0-2000 for small InDels). **J.** Inversions identified in genome assemblies. Regions of introgression less than 1 Mb were thickened to 1Mb for visualization.

243  
244  
245

### **Introgression Introduced Substantial Sequence and Structural Variation into the Cultivated Sunflower Gene Pool**

246  
247  
248  
249  
250  
251  
252  
253  
254  
255

We compared densities of SNPs and small InDels between regions with introgression in one to five genomes (polymorphic introgressed regions) and those without introgression in any of the six highly contiguous cultivar genomes (non-introgressed). We calculated densities of SNPs and small InDels in non-overlapping windows of 500kb using the HA412-HOV2 genome as the reference and compared between polymorphic introgressed regions and non-introgressed regions. Overall, regions polymorphic for primary or secondary introgressions had more SNPs and small InDels than non-introgressed regions (Fig. 2A,B). Secondary introgressions had more SNPs and small InDels than primary introgressions, although the differences were not significant. Analyses of 287 individuals comprising the cultivated SAM population (see below) revealed that introgressed regions



256 also possessed significantly higher numbers of SNPs compared to non-introgressed  
257 regions, and secondary introgressions displayed significantly more SNPs than primary  
258 introgressions (SI Appendix, Fig. S17).  
259

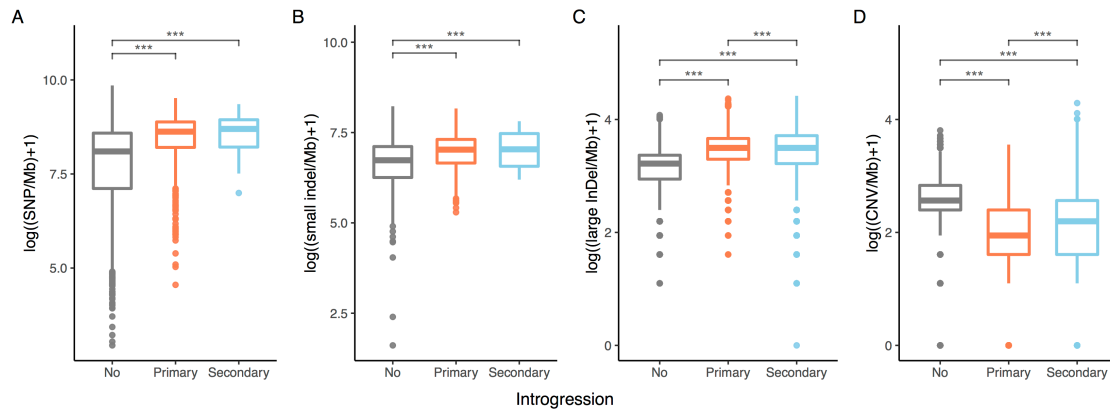

260 **Fig. 2.** Densities of **A.** SNPs, **B.** Small InDels (<50bp), **C.** Large InDels (>50bp) and **D.** CNVs in regions  
261 without introgression, regions with introgressions from the primary gene pool (primary introgressions) and  
262 regions from the secondary gene pool (secondary introgression). The densities of SNPs and small InDels  
263 were calculated in non-overlapping windows of 500kb using the HA412-HOv2 genome as the reference.  
264 Densities of large InDels and CNVs were calculated in 10,000 samplings of 500kb windows in each type of  
265 region between each genome and the HA412-HOv2 reference. Asterisks denote significance in independent  
266 t-tests: \*\*\* $P<0.001$ .  
267  
268

269 Wild introgressions also introduced large (>50bp) insertions and deletions (large InDels)  
270 into the cultivated sunflower gene pool. In each pair of genome comparisons with the  
271 HA412-HOv2 reference, both primary and secondary introgressions had significantly  
272 higher numbers of large InDels compared to regions without introgression (Fig. 2C).  
273 Conversely, introgressions had significantly fewer CNVs than non-introgressed regions  
274 (Fig. 2D). We suspect that this is due to the reduced strength of purifying selection on TE  
275 copy number in the cultivated gene pool.  
276

277 Across the six high-contiguity genomes, chromosomal inversions had an overlap of 58  
278 Mb with primary introgressions and 5.7 Mb with secondary introgressions, which is  
279 significantly higher than a random distribution in both cases (primary introgressions:  
280  $P<0.001$ , secondary introgressions:  $P=0.0269$ ). In each pair of genome comparisons with  
281 the HA412-HOv2 reference, the number of inversions introduced from the primary gene  
282 pool varied from 0.24 to 0.43 per Mb, which is significantly ( $P<0.01$ ) higher than that in  
283 non-introgressed regions (0.07-0.08/Mb). More inversions were introduced from the  
284 secondary than from the primary gene pool in each genome, except in HA89 where no  
285 inversions were found in secondary introgressions (SI Appendix, Fig. S18).  
286

### 287 **Introgression Reduced Genetic Load**

288

289 We estimated the effect of introgression on genetic load by calculating the ratio of the  
290 number of alternative stop codons ( $P_{\text{nonsense}}$ ) and the number of nonsynonymous  
291 mutations ( $P_{\text{nonsyn}}$ ) in 500-kb sliding windows (Renaut and Rieseberg 2015). The statistic  
292 was negatively correlated with recombination rate (SI Appendix, Fig. S19), in accord  
293 with previous understanding of the role of recombination in eliminating deleterious

294 mutations (Huang et al. 2022).  $P_{\text{nonsense}}/P_{\text{nonsyn}}$  of polymorphic primary introgressions was  
295 lower in null recombination rate regions than that of non-introgressed regions and  
296 comparable to non-introgressed regions in regions of reduced and high recombination  
297 rate (SI Appendix, Fig. S19). Secondary introgressions displayed a trend towards reduced  
298 load (i.e., lower  $P_{\text{nonsense}}/P_{\text{nonsyn}}$  ratios) compared to non-introgressed regions, but the  
299 sample size was too small to draw conclusions. Analyses of 287 individuals in the  
300 cultivated SAM population (see below) provided clearer results. While  $P_{\text{nonsense}}/P_{\text{nonsyn}}$   
301 was also negatively correlated with recombination rate in this dataset (SI Appendix, Fig.  
302 S20), primary introgressions displayed significantly lower  $P_{\text{nonsense}}/P_{\text{nonsyn}}$  than non-  
303 introgressed regions in all recombination rate categories, and secondary introgressions  
304 had significantly lower  $P_{\text{nonsense}}/P_{\text{nonsyn}}$  than non-introgressed regions in regions of null  
305 and reduced recombination rate (Fig. 3).  
306

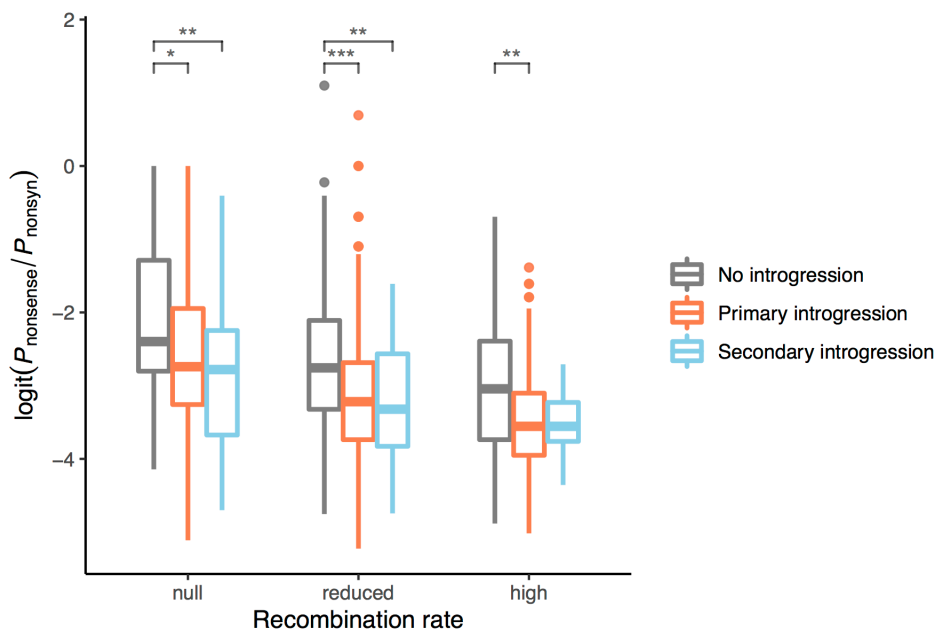

307  
308 **Fig. 3.** Ratio of alternative stop codons and nonsynonymous mutations ( $P_{\text{nonsense}}/P_{\text{nonsyn}}$ ) in regions without  
309 introgression, regions with introgressions from the primary gene pool (primary introgressions) and regions  
310 from the secondary gene pool (secondary introgressions) in the cultivated sunflower association mapping  
311 population.  $P_{\text{nonsense}}/P_{\text{nonsyn}}$  was calculated in non-overlapping windows of 500kb. Windows of each  
312 recombination rate category (high:  $> 2$  cM/Mb, reduced: 0.01-2 cM/Mb, null:  $< 0.01$  cM/Mb) were  
313 compared separately. Asterisks denote significance in independent t-test:  $*0.05 > P > 0.01$ ,  $**0.01 > P > 0.001$ ,  
314  $***P < 0.001$ .  
315

### 316 **Introgressions Introduced Gene Presence/absence Polymorphisms**

317  
318 A total of 77,334 genes were obtained across the 10 genome assemblies, among which  
319 75,791 were present in the 9 genomes of cultivars. Altogether, 31,099 genes in the pan-  
320 genome displayed PAV between genomes. After filtering based on synteny, we retained  
321 75,369 genes with coordinate information for homologs, 29,948 of which showed PAV.  
322

323 We found that introgressions introduced significantly more gene PAVs than non-  
324 introgressed regions, but gene PAVs from primary and secondary introgressions did not

325 differ significantly, except in one pair (Fig. 4). The total number of genes introduced by  
326 primary introgressions ranged from 889 for HA300 to 4,323 for RHA438, respectively,  
327 whereas between 26 (HA89) and 1,800 (OQP8) genes were introduced by secondary  
328 introgressions (SI Appendix, Fig. S21). On average, 12% of the PAVs result from  
329 primary introgressions and 5% from secondary introgressions. Across the nine cultivar  
330 genomes, a total of 3,187 genes were introduced by introgression from crop wild  
331 relatives. Unsurprisingly, the number of new genes introduced by introgression is closely  
332 correlated with total amount of introgression detected in a genome, so we see more new  
333 genes resulting from introgression in the restorer lines (PSC8, RHA438 and OQP8) than  
334 from maintainer lines (SI Appendix, Fig. S21).  
335

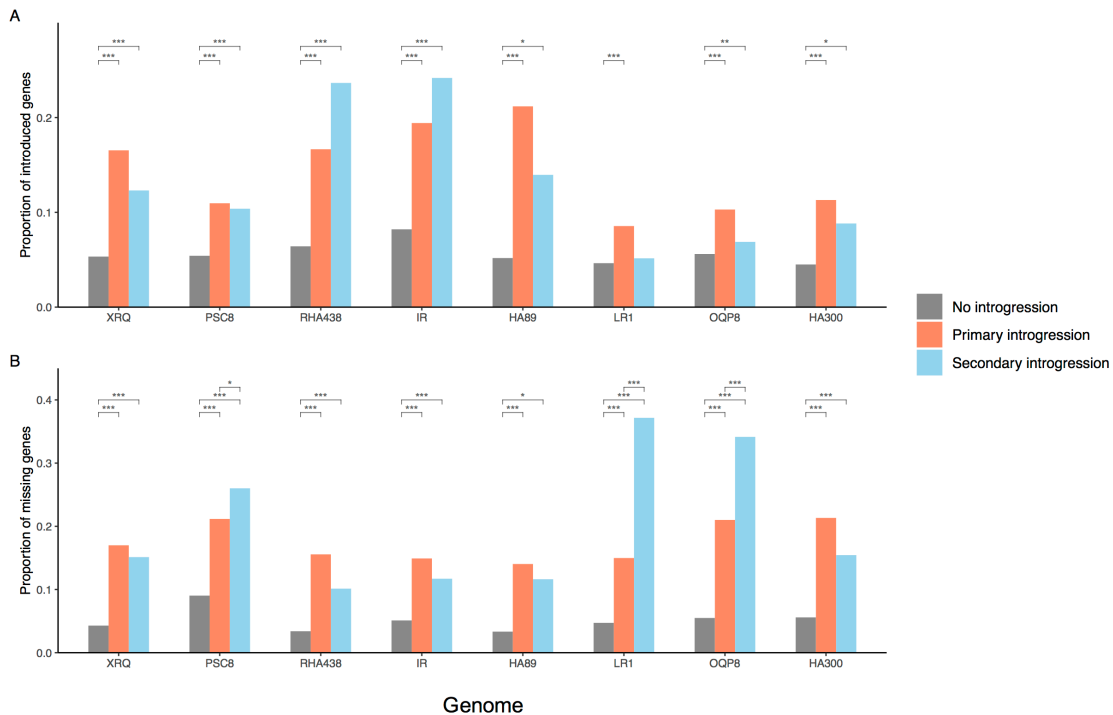

336  
337 **Fig. 4.** Proportions of **A.** introduced genes and **B.** missing genes in introgressed and non-introgressed  
338 regions in each cultivar genome compared to the HA412-HOv2 reference. Asterisks denote significance in  
339 independent t-test: \*0.05 > P > 0.01, \*\*0.01 > P > 0.001, \*\*\*P < 0.001.  
340

341 In addition to new genes, introgressions often lack genes that are present in syntenic non-  
342 introgressed regions (Fig. 4B). Primary introgressions introduced 383 (HA300) to 1,577  
343 (RHA438) missing genes, whereas between 22 (HA89) and 2095 (OQP8) gene absences  
344 were caused by secondary introgressions (SI Appendix, Fig. S21). About 17-32% of the  
345 gene absences in primary introgressions had a homolog present in the wild *H. annuus*  
346 (PI659440) genome, indicating that many of such missing genes represent gene PAVs in  
347 the wild donor species.  
348

### 349 **Introgressions in the Cultivated Sunflower Association Mapping (SAM) Population**

350

351 We generated a SNP dataset using previously published sequence data for 287  
352 individuals in the SAM population (Mandel et al. 2011; Hübner et al. 2019), as well as

353 the aforementioned whole-genome sequences from native North American landraces and  
354 five possible wild donor species. Then, we determined the locations and parentage of  
355 introgressions in each of the 287 cultivated genotypes. We found that all samples  
356 contained putative introgressions and that all chromosomes appeared to have experienced  
357 introgression in at least one of the SAM samples (Fig. 5). The amount of introgression in  
358 each sample varied from 0.4% to 11% with a number of samples having large blocks of  
359 introgression (Dataset S5). On average, each sample had ca. 3% of the genome covered  
360 with introgressions from the primary gene pool and 0.1% derived from the secondary  
361 gene pool, which is similar to the estimates from the genome assemblies, but lower than  
362 previously estimated for the SAM population using a different method (Hübner et al.  
363 2019). Restorer lines had more introgression than maintainer lines on average (3.8% vs.  
364 2.9%). Maintainer and restorer lines showed distinct patterns of introgression on the first  
365 half of chr8, a substantial portion of chr10, part of chr12, as well as the end of chr13,  
366 broadly consistent with previously identified regions of high divergence between these  
367 groups (Baute et al. 2015; Hübner et al. 2019; Owens et al. 2019). Small regions of  
368 introgression from the secondary gene pool were identified at the end of chr13 in most of  
369 the restorer lines, but not in maintainers. These regions roughly correspond to the  
370 introgression from *H. petiolaris* in the PSC8 genome, corroborating previous findings of  
371 the *Rf1* restorer allele at this position (Gentzbittel et al. 1999; Baute et al. 2015).

372

373 Using these datasets, we evaluated the presence or absence of introgressions in 1kb non-  
374 overlapping windows across the genome. We took this approach to account for the fact  
375 that most introgressions are fragmented by recombination as they are incorporated in the  
376 cultivated sunflower gene pool and to permit genome wide association studies (GWAS)  
377 and various population genomic analyses. A total of 505,038 and 5,243 introgression  
378 variants were detected at a  $\geq 3\%$  minor allele frequency cut off for primary (wild *H.*  
379 *annuus*) and secondary germplasm donors, respectively (Fig. 5).

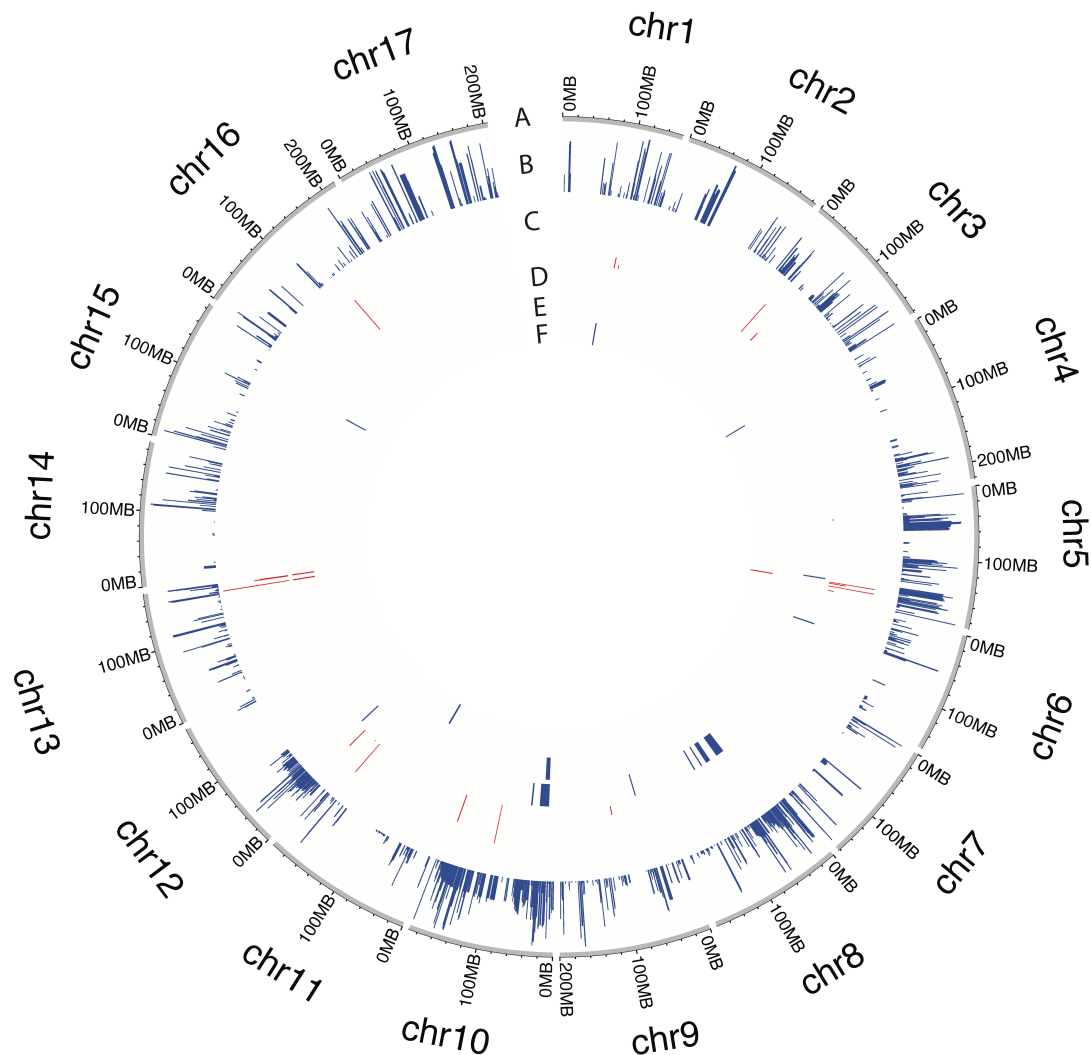

380  
381  
382  
383  
384  
385  
386  
387  
388  
389

**Fig. 5.** Frequency of introgression variants in the SAM population and associated introgressions with traits in GWA analysis. **A.** Chromosomes of the HA412-HOv2 reference. **B.** Frequency of introgression variants from the primary germplasm. **C.** Frequency of introgression variants from secondary germplasm. **D.** Introgressed genomic intervals associated with developmental traits (number of branches, head weight, head diameter, stem weight, leaf weight, and plant biomass). **E.** Introgressed genomic intervals associated with quality traits (seed size and oil percentage). **F.** Introgressed genomic intervals associated with flower pigmentation (anthocyanins in disk florets, anthocyanins in stigmas). Blue and red representing introgressions from primary and secondary germplasm, respectively.

390 We then performed GWAS of the introgression variants for 16 traits that were previously  
391 phenotyped (Mandel et al. 2013; Nambeesan et al. 2015; Lee et al. 2022) in common  
392 gardens at three locations (Watkinsville, GA, Ames, IA, and Vancouver, BC) using a  
393 model that corrects the population structure and familial relatedness. Our results revealed  
394 that introgressions have a significant effect on the phenotypic variation in the SAM  
395 population (SI Appendix, Fig. S24). After merging GWA outliers in the range of 10 Mb,  
396 introgression intervals were found to underlie 27 quantitative trait loci (QTLs) for 12  
397 phenotypic traits (Table S7; Fig. 5). Of these, 23 (85.18%) were introgressed from  
398 primary germplasm (wild *H. annuus*), while 4 (14.81%) were introgressed from

399 secondary germplasm. The introgressed QTLs reduced head diameter and head weight,  
400 but increased plant biomass, number of branches, anthocyanins in disk florets, number of  
401 days to flowering, dry leaf weight, oil percentage, seed size, dry stem weight, and  
402 anthocyanins in stigmas. For stem diameter, introgressed QTLs with negative and  
403 positive effects were found. The 27 QTLs were not fully independent. A primary  
404 introgression near the beginning of chr10 that introduced branching into restorer lines,  
405 also effects oil content, seed size, head diameter, and head weight.

406

407 However, GWAS does not consider the effects of introgression variants that fall below a  
408 stringent significance threshold. Therefore, we employed the following ridge regression  
409 model to estimate phenotypic effects across all introgression variants:

410

411

$$y = 1\beta + Zg + \varepsilon$$

412

413 Where  $y$  is a vector of the phenotypic trait;  $Z$  is an incidence matrix containing the allelic  
414 states of the markers ( $Z = \{-1, 1, 0\}$ ); -1 and 1 represent homozygous non-introgressed  
415 and introgressed genotypes at a locus, respectively and 0 represents the heterozygous  
416 state;  $\beta$  is a vector of fixed effects;  $g$  is the vector of marker effects; and  $\varepsilon$  is a vector of  
417 residuals.

418

419 To assess whether introgressions overall have a significant impact on the 16 phenotypic  
420 traits, we compared the average value of introgression marker effects to a null  
421 distribution. Our results indicated that introgressions overall have negative effects on  
422 traits associated with yield, including head diameter, head weight, leaf area, leaf weight,  
423 seed size, seed weight, stem diameter, and stem weight (Fig. 6). This pattern was seen for  
424 introgressions from both the primary (wild *H. annuus*) and secondary gene pool. In  
425 contrast, biomass, branching, and specific leaf area (SLA) showed an increase in the trait  
426 value for introgressions from both gene pools. Branching was introgressed into restorer  
427 lines to prolong the flowering period for hybrid production and increased SLA is thought  
428 to be associated with drought tolerance (Wellstein et al. 2017), so both changes can be  
429 viewed as potentially desirable. We also observed gene pool-specific effects for stigma  
430 and disk floret anthocyanins and oil percentage; primary introgressions increase  
431 anthocyanin content and reduce oil percentage, whereas introgressions from secondary  
432 germplasm do not cause significant change (Fig. 6). Lastly, a comparison of effect sizes  
433 of introgression variants from the primary versus secondary gene pool indicate that the  
434 latter have much larger effects on average (SI Appendix, Fig. S25).

435

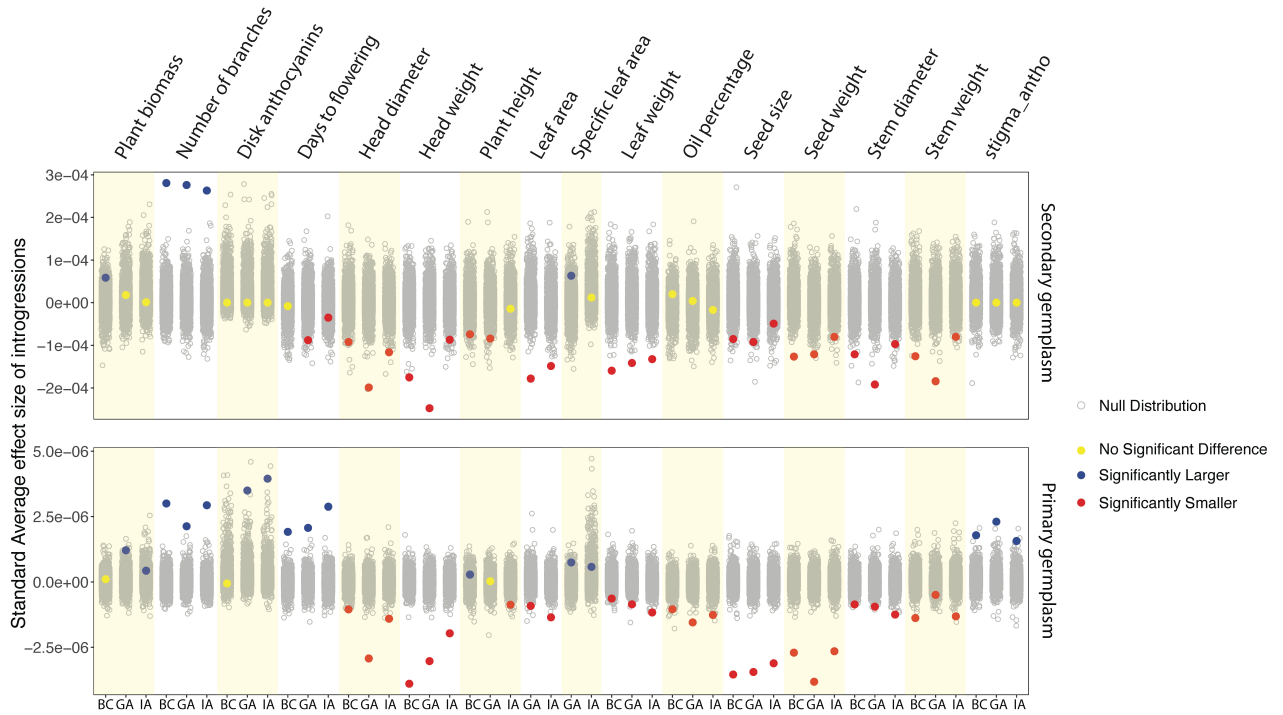

436  
437  
438  
439  
440  
441

**Fig. 6.** Standardized average effect sizes of introgression variants (calculated from Z-score normalized trait values) in the SAM population. Gray dots show the null distribution of effect sizes. Red, blue and yellow represent the decreasing, increasing, or neutral effects of introgressions on phenotypic traits at  $P$ -value  $< 0.05$ . BC: British Columbia, GA: Georgia, IA: Iowa.

442  
443  
444  
445  
446  
447  
448  
449  
450  
451  
452  
453

Next, we asked whether the frequency of introgression variants was correlated with their effect size. Higher frequency introgressions are more likely to have been targets of artificial selection, so we were especially interested in the potential for linkage drag associated with such introgressions. We found a significant correlation ( $P < 0.05$ ) between the frequency and the effect size of introgression variants from both the primary and secondary gene pools across all traits and common gardens (Fig. 7; SI Appendix, Fig. S26). In general, higher frequency introgressions have larger phenotypic effects than lower frequency introgressions. Changes in beta coefficients were mostly consistent between donor gene pools: biomass, branching, SLA, oil percentage, and stigmas anthocyanins had positive beta values for introgressions from both the primary and secondary gene pool, whereas negative beta values were observed for the other traits.

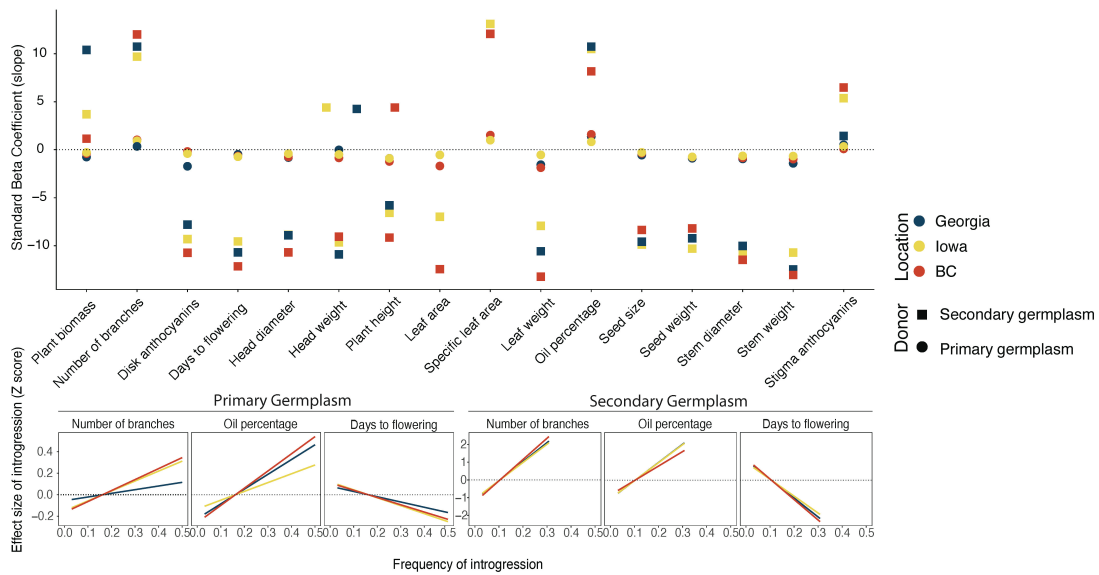

454  
 455 **Fig. 7.** Results from linear regression model where X = introgression frequency in SAM population and Y =  
 456 introgression effect on phenotype trait. **A.** The standard beta coefficient of all traits in three common garden  
 457 experiments. **B.** A fitted linear regression line for branching, oil percentage, and days to flower for  
 458 introgressions from primary and secondary germplasm.  
 459

## 460 Discussion

### 461 New Genomic Resources for Sunflower

462  
 463  
 464 For the past two decades, the plant biology community has made substantial investments  
 465 into the generation of genomic tools and resources for crops and their wild relatives,  
 466 especially high-quality reference sequences (Thudi et al. 2021). These investments are  
 467 now bearing dividends, ranging from exciting new discoveries about plant domestication  
 468 (Purugganan 2021) to the genetic dissection of key ecological and agronomic traits  
 469 (Kuroha et al. 2018; Temme et al. 2020) to increases in the speed and precision of plant  
 470 breeding (Jannink et al. 2010). Despite these successes, the goalposts have moved. Plant  
 471 genomes have been shown to vary remarkably in their content and structure, even within  
 472 species (Lei et al. 2021; Bayer et al. 2020), and these differences often underlie variation  
 473 in phenotypic traits (Gage et al. 2019). Thus, tens or even hundreds of reference quality  
 474 genomes are needed to fully understand the genomic basis of phenotypic variation (Gage  
 475 et al. 2019; Della Coletta et al. 2021). Here we report progress toward this goal by  
 476 providing eight new chromosome-level genomes for sunflower along with significant  
 477 improvements of two previously published sunflower genomes (Badouin et al. 2017).  
 478 These ten publicly available genomes, which encompass much of the genetic space in the  
 479 cultivated sunflower gene pool (SI Appendix, Fig. S1), represent a valuable resource for  
 480 sunflower research and breeding.  
 481

482 While the genomes were sequenced and assembled using different sequencing  
 483 technologies and depths, we were able to obtain chromosome level assemblies for all  
 484 genotypes, even with sequencing depth as low as 10 $\times$  when using PacBio HiFi reads and



485 reference-guided assembly (for HA300; Table 1). We did see a trade-off between lower  
486 sequence coverage and BUSCO scores, suggesting that the quality of gene annotation  
487 suffers at lower sequencing depths. However, excellent BUSCO scores were obtained  
488 with sequence depth in the 30x range with HiFi reads, which may represent an optimal  
489 balance between sequencing cost and genome quality.

490

491 The cultivated genomes range from 3.02 to 3.23 Gb in size, with the wild genome at 3.16  
492 Gb falling in the middle. Thus, domestication in sunflower does not appear to be  
493 accompanied by a change in genome size. On the other hand, the 10 genomes are ca. 15%  
494 smaller than previous genome size estimates for *H. annuus* (which included HA89, one  
495 of the genomes sequenced here) based on Feulgen staining (Sims and Price 1995) and  
496 flow cytometry (Baack et al. 2005). Given that the two different scaffolding approaches  
497 (Bionano optical mapping and Hi-C sequencing) employed in the present study resulted  
498 in similar genome size estimates, we suspect that previous work over-estimated the size  
499 of the sunflower genome.

500

501 Synteny comparisons of the six high-contiguity genomes failed to reveal large-scale  
502 chromosomal rearrangements between the genomes, except for one 21 Mb inversion.  
503 However, we did find millions of small indels, thousands of deletions and insertions, and  
504 hundreds of inversions. We also detected numerous differences in gene content, with  
505 approximately 40% of the 77,334 genes in the sunflower pan-genome varying between  
506 genomes. This is higher than the 27% previously reported based on re-sequencing data  
507 from the SAM population (Hübner et al. 2019), possibly because the present study is  
508 based on comparisons of fully assembled reference genomes. Estimates of the proportion  
509 of genes displaying presence absence polymorphisms in other plant species range from  
510 15-66% (Bayer et al. 2020; Hufford et al. 2021), so the level of polymorphism in  
511 sunflower is not unusual. Like other plant species, gene presence-absence polymorphisms  
512 have been shown to play an important functional role in sunflower. For example,  
513 Todesco et al. (2020) showed that a PAV for *HaFTI* was responsible for a 77-day shift in  
514 flowering time between two ecotypes of the silverleaf sunflower. More recently, Lee et  
515 al. (2022) found that the complementation of PAVs in sunflower hybrids was the primary  
516 cause of heterosis.

517

## 518 **Genomic Consequences of Introgression**

519

520 Analyses of the ten genomes provide insights regarding the sources of variation among  
521 them. Consistent with previous reports, about three quarters of the sunflower genome is  
522 made up of LTR transposons and other TEs, and many of the differences between  
523 genomes result from variability in the accumulation, movement, and elimination of TEs  
524 (Badouin et al. 2017). Also, sunflower is the product of a whole genome duplication  
525 event approximately 29 Mya (Barker et al. 2008, 2016; Badouin et al. 2017), and the  
526 differential retention of duplicated sequences likely contributes to genomic diversity as  
527 well.

528

529 Introgression from wild relatives represents another potential source of variation (Hübner  
530 et al. 2019; Owens et al. 2019). By examining the location and parentage of  
531 introgressions in the cultivated genomes, we were able to show that introgressed regions  
532 have greater diversity than non-introgressed regions as measured in terms of SNPs, small  
533 indels, deletions, insertions, inversions, and gene PAVs. The impact of the introgressions  
534 was most pronounced for the latter, with introgressions accounting for about 17% of  
535 PAVs. This is qualitatively similar to wheat, where differences in the gene content of  
536 introgressions from divergent donors appears to cause reduced performance (Hao et al.  
537 2020). Introgressions also reduced genetic load at protein coding genes and variation in  
538 CNVs, possibly because of relaxed purifying selection in the cultivated gene pool. CNVs  
539 in sunflower are mostly caused by variation in TE copy number, which may explain why  
540 introgression affects them differently than gene PAVs.

541  
542 A previous study of the SAM population showed that the absence allele at PAVs often  
543 has deleterious impacts on yield-associated traits (Lee et al. 2022), and we speculate that  
544 they may be the primary genetic cause of linkage drag. The genetic architecture of  
545 linkage drag has implications for mitigation strategies. If the maladaptive allele is  
546 commonly the absence variant of a PAV, then it could be complemented in hybrids  
547 containing the domesticated allele, whereas an allele that was maladaptive for other  
548 reasons (e.g., additive effect polygenes) is unlikely to be rescued in hybrids.  
549 Unfortunately, we were unable to directly test this hypothesis in the present study  
550 because the SAM population is comprised mainly of inbred lines.

## 551 **Phenotypic Consequences of Introgression**

552  
553 Introgressions from the primary gene pool (i.e., wild *H. annuus*) had a significant impact  
554 on all 16 traits phenotyped in the SAM population, whereas those from the secondary  
555 gene pool affected 13 of the 16 traits (Fig. 8). This is unsurprising since introgressions  
556 from wild *H. annuus* are much more frequent in the SAM population than those from the  
557 secondary gene pool. On the other hand, the effect sizes of secondary introgressions are  
558 much larger on average than those from wild *H. annuus* (SI Appendix, Fig. S25).

559  
560 Examination of the direction of effects of the introgressions indicates that most reduce  
561 desirable agronomic trait values, especially traits that correlate closely with yield,  
562 including head diameter, head weight, seed size, and seed weight, though there are  
563 exceptions. For example, introgressions typically increase SLA, which is frequently  
564 associated with greater drought tolerance (Wellstein et al. 2017). This makes sense given  
565 that sunflower wild relatives are more drought tolerant than cultivars (Baack et al. 2008;  
566 Seiler et al. 2017). In addition, introgressions show an increase in biomass, but this  
567 appears to be a by-product of increased branching, which has been introduced into  
568 restorer lines to prolong flowering and thus pollen shed. Lastly, while introgressions may  
569 negatively affect traits on average, there can be individual introgressions with effects in  
570 the opposite direction. For example, an introgression on chr10 from wild *H. annuus* that  
571 is associated with increased branching also results in increased oil content and seed size  
572

573 (Table S7). Overall, however, introgressions from wild *H. annuus* negatively affected the  
574 latter two traits.

575

576 An unexpected result was that higher frequency introgressions had larger effects on traits  
577 (both positive and negative). We speculate that such high frequency introgressions have  
578 been directly targeted by artificial selection. In some instances, the trait we phenotyped  
579 was likely the target of selection (e.g., branching and oil content), whereas maladaptive  
580 trait values are most likely the product of linkage drag for traits such as disease resistance  
581 that were not phenotyped in the present study.

582

## 583 **Conclusions**

584

585 In summary, by utilizing a combination of high-quality reference genomes and genotypic  
586 and phenotypic analyses of the SAM population, we provide a comprehensive assessment  
587 of the impact of linkage drag on the cultivated sunflower genome and on plant  
588 performance. We show that despite the numerous benefits deriving from tapping crop  
589 wild relatives, such as the introduction of desirable traits and genetic and phenotypic  
590 variation (Warschefsky et al. 2014; Dempewolf et al. 2017), there can be downsides,  
591 including reductions in yield-related traits. We speculate that this is largely due to the  
592 introduction of variation in gene content; cultivars containing introgressions not only  
593 have new genes, but they also are missing genes that would otherwise be present, which  
594 can have deleterious consequences (Lee et al. 2022).

595

596 So, what strategies can be employed to mitigate the effects of linkage drag? Marker-  
597 assisted selection is widely employed to reduce the sizes of introgressed regions (Young  
598 and Tanksley 1989; Hao et al. 2020), although this can be challenging in genomic regions  
599 of low recombination, such as near the branching locus on chr10. Genome editing and  
600 other biotechnology approaches have the potential to introduce favorable alleles without  
601 linkage drag (Kawall 2019), although we recognize that the application of such  
602 approaches are currently limited by regulatory and socio-political factors (Friedrichs et al.  
603 2019). If the genetic factors underlying linkage drag are mostly recessive, such as would  
604 be the case for missing genes, then hybrid production offers an effective strategy for  
605 ameliorating linkage drag. Lastly, our results indicate that introgressions from distantly  
606 related species are much more problematic than those from the fully compatible wild  
607 progenitor of cultivated sunflower. Thus, linkage drag could be ameliorated by restricting  
608 pre-breeding efforts to closely related and fully compatible wild relatives. While certain  
609 desirable traits might not be expressed in close relatives, many of the underlying alleles  
610 may exist in the primary gene pool, albeit at a lower frequency. If so, there is a growing  
611 potential for the use of bioinformatics approaches to identify compatible genebank  
612 germplasm containing the allele(s) of interest (Guerra et al. 2022). Furthermore, natural  
613 introgression from the secondary gene pool into the primary gene pool may provide a  
614 source of alleles that have already been purged of deleterious incompatibilities and show  
615 reduced linkage drag.

616

617 **Materials and Methods**

618

619 For full materials and methods, see SI Appendix, Supplementary Information Text.

620

621 **Diversity Analyses**

622

623 To show the relationships of the nine sequenced inbred lines to cultivated sunflower  
624 genetic diversity, we positioned them in genetic space using principal components  
625 analysis (SI Appendix, Fig. S1) based on unpublished genotypic data comprising 16,048  
626 SNP markers genotyped on 2,850 cultivated lines.

627

628 **Nucleic Acid Extractions, Library Preparations, and Sequencing**

629

630 For DNA sequencing, high molecular weight DNA was extracted from young leaves  
631 using several different protocols, including a modified CTAB protocol (Todesco et al.  
632 2020) for HA412-HO, magnetic bead extraction (Mayjonade et al. 2016) for the  
633 remaining cultivated genotypes, and the QIAGEN Genomic-tip 100g procedure for  
634 PI659440.

635

636 For the HA412-HOv2 genome (which is an updated version of the HA412-HO genome,  
637 Badouin et al. 2017), paired-end and mate-pair libraries were generated and sequenced  
638 using Illumina sequencing technology to a total depth of 214× (Dataset S1). In addition,  
639 10× Genomics Chromium libraries were prepared and sequenced using Illumina to 37×  
640 depth (Dataset S1).

641

642 For XRQv2 (which is an updated version of the XRQ genome; Badouin et al. 2017) and  
643 the newly sequenced genotypes, library preparation and sequencing employed Pacific  
644 Biosystems (PacBio) technology (Dataset S1). RSII system raw reads were generated for  
645 XRQv2 and PSC8, Sequel II system raw/CLR plus HiFi reads for IR and RHA438, and  
646 Sequel II HiFi reads for PI659440, HA89, LR1, OQP9 and HA300.

647

648 We sequenced full-length cDNA using PacBio SMRT sequencing technology (IsoSeq)  
649 for the IR, RHA438, PI659440, and HA89 lines. In brief, leaf, bud and stem tissues were  
650 collected for each accession, flash frozen in liquid nitrogen. RNA was subsequently  
651 extracted using the Spectrum Plant Total RNA kit from Sigma-Aldrich, and purified  
652 cDNAs were sequenced on PacBio's Sequel II instrument.

653

654 **Scaffolding**

655

656 To enable chromosome-level scaffolding of the HA412-HOv2 genome, Hi-C libraries  
657 (Burtin et al. 2013) were generated by Dovetail Genomics and sequenced to 49× depth by  
658 the McGill University and Génome Québec Innovation Centre. For the XRQv2, PSC8,  
659 IR, RHA438, PI659440, and HA89 genomes, scaffolding was aided by the production of  
660 optical maps. Briefly, ultra-HMW DNA was purified from young flash frozen leaves  
661 according to the Plant tissue DNA Isolation Base Protocol of Bionano Genomics (BNG).  
662 The ultra-HMW DNA was subsequently labelled, stained, loaded onto Saphyr chips, and

663 run on BNG's Saphyr platform according to the Saphyr System User Guide. Digitalized  
664 labelled DNA molecules were assembled to optical maps using BNG's Access software.

665

### 666 **Genome Assembly**

667

668 *De novo* assembly was conducted using different protocols depending on the genotype,  
669 the accuracy of raw sequence data and the bioinformatics tools available at the time when  
670 each genotype was sequenced (Dataset S2). In brief, the HA412-HOv2 genome was  
671 assembled with DeNovoMAGIC v3 (NRGene Technologies), and scaffolded using Hi-C  
672 sequencing data (Dovetail Genomics) and the HiRise assembler (Putnam et al. 2016).

673

674 Contigs for XRQv2, PSC8, IR, and RHA428 were generated using a meta-assembly  
675 approach (Raymond et al. 2018), whereas assembly of the other genomes used canu v2  
676 (Koren et al. 2017). A first scaffolding step was performed for six genomes (XRQv2,  
677 PSC8, IR, RHA438, PI659440, and HA89) using BNG optical maps, and AllMaps (Tang  
678 et al. 2015) was used to anchor the sequences on the 17 chromosomes for all nine PacBio  
679 genomes.

680

### 681 **Genome Annotation**

682

683 Gene models were predicted using the EuGene pipeline (Sallet et al. 2019), as described  
684 previously (Badouin et al. 2017). Previous RNAseq (Badouin et al. 2017) and IsoSeq  
685 (PRJNA517222) data were used for functional annotation of the HA412-HOv2, XRQv2,  
686 and PSC8 genomes. We generated IsoSeq data for the IR, RHA438, PI659440, and HA89  
687 lines, which were employed for the annotation of each genome. IsoSeq data for HA89  
688 were used to annotate the LR1, OQP9 and HA300 genomes. Details of the annotation  
689 processes along with assessment results generated with BUSCO v5.1.2 (-m prot -l  
690 embryophyta\_odb10) software (Manni et al. 2021) are provided in Dataset S3.

691

692 To ensure that we were not over-estimating gene content variation among the ten  
693 sunflower genomes, we developed a pipeline to filter out gene fragments resulting from  
694 TE activity and other genomic processes  
695 ([https://github.com/megahitokiri/Sunflower\\_annotation\\_Snakemake](https://github.com/megahitokiri/Sunflower_annotation_Snakemake)). At each step,  
696 parameters were fine-tuned by comparison with a set of functionally well-characterized  
697 genes to ensure the filtering was not overly aggressive. First, we employed the Extensive  
698 de novo TE Annotator (EDTA) to find areas with high content of repeated elements (Ou  
699 et al. 2019). Gene models whose exonic or 3'UTR regions overlapped more than 75%  
700 with TEs or other repetitive sequences were filtered out. The remaining gene models  
701 were further filtered to remove those with pseudogene marks, lacking introns, or that  
702 predicted proteins of less than 50 amino acids in length (Table S5).

703

### 704 **Identification of Sequence and Structural Variants**

705

706 Because reference-guided scaffolding of the low-depth genomes (LR1, OQP8 and  
707 HA300) can cause spurious results, we only included the six high-contiguity cultivar  
708 genomes (HA412-HOv2, XRQv2, PSC8, RHA438, IR, and HA89) to identify sequence

709 and structural variants. Each of the other five genomes was aligned to the HA412-HOv2  
710 reference using the nucmer4 program in MUMmer v4 (Marçais et al. 2018) with  
711 parameters '-b 1000 -c 1000'. The alignment results were filtered using the delta-filter  
712 program in MUMmer with parameters '-l -i 90 -l 1000' to remove dubious alignments  
713 and retain only one-to-one alignments for further detection of SNPs and small InDels  
714 (<50bp). We identified SNPs and small InDels within unambiguous alignment blocks  
715 using the show-snps program in MUMmer with the parameters '-C -l -r -T'. The results  
716 of each pair of genomes were converted into VCF format using the HA412-HOv2  
717 genome as the reference and the VCFs were combined using bcftools merge (Danecek et  
718 al. 2021).

719  
720 We filtered the alignment results using delta-filter with parameters '-m -i 90 -l 1000', and  
721 the show-coords program in MUMmer was used to extract alignment blocks with  
722 parameters '-T -H -r -d' from the filtered alignment results. We then used SyRI v1.4  
723 (Goel et al. 2019) to parse the filtered results of MUMmer to identify candidate  
724 inversions, intra-, and inter-chromosomal translocations. We merged the structural  
725 variants following a stepwise method reported in Audano et al. (2019). We set the  
726 HA412-HOv2 genome as the reference and the structural variants identified between  
727 XRQv2 and the reference as the initial callset. New sites between each genome and the  
728 reference were added in sequence. Any variants in a callset that had 50% reciprocal  
729 overlap with an existing variant was excluded. The merging was performed separately for  
730 each type of variant. Neighboring blocks belonging to same type of events were merged.

731  
732 Large InDels and CNVs were identified using SVMU (Chakraborty et al. 2019) by  
733 parsing the delta file generated by delta-filter with parameters '-m -i 90 -l 1000'. The  
734 pipeline was run for each comparison with snp\_mode = 'l' and without LASTZ  
735 alignments. From the SVMU summary file, structural mutations with the tag INS/DEL  
736 and estimated size >50bp were treated as large InDels (in each sample genome with  
737 respect to the HA412-HOv2 reference), and those with the tag CNV-R/CNV-Q/nCNV-  
738 R/nCNV-Q and estimated size >50bp were treated as CNVs.

739

#### 740 **Identification of Gene Presence and Absence Variation**

741

742 We constructed a pan-genome for *H. annuus* using the nine cultivated genomes plus the  
743 one wild reference sequence (Table 1). We prepared a combined GFF3/FASTA file and  
744 extracted proteins from coding regions using the TRANSDECODER (version 5.5.0-  
745 gff3\_file to proteins) method (<https://github.com/TransDecoder/TransDecoder>). The  
746 protein files were input into the Roary pan-genome assembler (Page et al. 2015),  
747 modified to handle eukaryotic gene models, using a minimum threshold for detection of  
748 90%, no splitting of paralogs and PRANK core genes alignment. Core alignments were  
749 assessed via a dendrogram generated by Roary (SI Appendix, Fig. S22).

750

751 To distinguish between genes exhibiting true presence-absence polymorphisms and those  
752 that were annotated in one or more of the genomes but present and not annotated in  
753 others, we used representative nucleotide sequences of pan-genome genes generated by  
754 Roary to map them to each reference genome using GMAP (Wu and Watanabe 2005)

755 with the parameters ‘-t 12 -O -n 1 -f 2 --min-trimmed-coverage=0.90 --min-  
756 identity=0.90’. Custom scripts were used to integrate the mapped genes into the pan-  
757 genome table.

758

### 759 **Identification of Introgressions**

760

761 To identify introgressed regions in the genome assemblies of cultivated sunflower, we  
762 employed previously published resequencing data (Hübner et al. 2019; Todesco et al.  
763 2020) from native North American landraces and five wild sunflower species (*Helianthus*  
764 *annuus*, *H. argophyllus*, *H. petiolaris*, *H. niveus* and *H. debilis*) that are probable donors  
765 to modern cultivated lines based on breeding records and previous studies (Vear 2016;  
766 Badouin et al. 2017; Seiler et al. 2017; Hübner et al. 2019). For each assembly, raw reads  
767 of 48 landrace and wild samples were aligned to the genome and a VCF was generated  
768 using a GATK pipeline (SI Appendix, Supplementary Information Text). Introgressed  
769 regions in the genomes were identified using the ‘site-by-site’ linkage admixture model  
770 in STRUCTURE (Pritchard et al. 2000; Falush et al. 2003).

771

### 772 **Projection of Introgressed Regions onto HA412-HOv2 Reference**

773

774 We extracted the large alignment blocks (tag SYN/INV/TRANS/INVTR/DUP/INVDP)  
775 identified by SyRI between an assembly and the HA412-HOv2 reference as a lift-over  
776 map and converted the introgressions identified in each assembly to coordinates in the  
777 HA412-HOv2 reference. For each introgressed region, alignment blocks overlapping  
778 with the region were extracted and the positions in the original genome of the  
779 overlapping portions were projected to the reference based on the proportion relative to  
780 the start and end positions of the alignment block. Projected alignments of overlapping  
781 introgressed regions or that were within 1kb in the HA412-HOv2 reference were merged.

782

### 783 **Genetic Variation Analysis**

784

785 The densities of SNPs and small InDels were calculated using vcftools (Danecek et al.  
786 2011) in non-overlapping 500-kb windows. Windows overlapping with >50% with  
787 primary or secondary introgressed regions in at least one but not all genomes were  
788 defined as polymorphic introgressed windows. Densities of SNPs and small InDels were  
789 then compared between polymorphic introgressed regions and non-introgressed regions.  
790 We further annotated functional SNPs using snpEff v5.0c (Cingolani et al. 2012) and  
791 calculated the ratio of the number of alternative stop codons ( $P_{\text{nonsense}}$ ) and the number of  
792 nonsynonymous mutations ( $P_{\text{nonsyn}}$ ) in the 500-kb windows and compared polymorphic  
793 introgressed windows and non-introgressed windows within the same recombination rate  
794 category (high: > 2 cM/Mb, reduced: 0.01-2 cM/Mb, null: <0.01 cM/Mb). For the SAM  
795 population, we defined polymorphic introgressed windows as those with MAF > 0.01.  
796 SNP density and  $P_{\text{nonsense}}/P_{\text{nonsyn}}$  were then calculated in non-overlapping windows of 500  
797 kb and compared in the same way as for the genome assemblies.

798

799 For large InDels and CNVs, in each pair of genomes, we randomly sampled fragments of  
800 500kb for 10,000 times within polymorphic primary introgressed regions, polymorphic  
801 secondary introgressed and non-introgressed regions, respectively. Densities of large  
802 InDels and CNVs were calculated and compared between these regions.

803  
804 We permuted the locations of the inversions identified across the genome assemblies  
805 10,000 times and calculated how often the overlapping size with primary introgressions  
806 and secondary introgressions exceeded the observed value, respectively. In each pair of  
807 genomes, an inversion was defined as introgression-introduced if one orientation of the  
808 inversion overlapped with primary or secondary introgressions while the other orientation  
809 did not. The incidences of inversions were calculated for polymorphic primary  
810 introgressed regions, polymorphic secondary introgressed regions and regions without  
811 introgression.

812

### 813 **Effects of Introgression on Gene Presence Absence Variation**

814 To determine how introgression affected gene content, we filtered the table of gene  
815 presence-absence polymorphism based on synteny between the genomes as determined  
816 by MUMmer4 (Marçais et al. 2018). Using the synteny-filtered table of gene presence-  
817 absence polymorphisms, as well as the introgressions identified in each genome, we  
818 assigned a single introgression value for each gene in a genome if > 50% of the gene  
819 overlapped with regions of primary or secondary introgressions. Each missing copy in a  
820 genome was assigned an introgression value if the corresponding MUMmer alignment  
821 overlapped >50% with regions of primary or secondary introgressions. We compared  
822 each of the cultivar genomes to the HA412-HOv2 reference and examined the  
823 presence/absence of genes in introgressed and non-introgressed regions.

824

### 825 **Effects of Introgressions on Phenotypic Variation in the SAM Population**

826

827 We made use of 287 cultivated accessions in the SAM population, which was previously  
828 sequenced to 5-25x depth (Hubner et al. 2019). The SAM population includes close to  
829 90% of cultivated sunflower genetic diversity (Mandel et al. 2011) and is comprised of  
830 both inbred and open-pollinated lines, as well as oilseed and confectionary cultivars. All  
831 287 accessions, as well as the aforementioned 48 landrace and wild samples, were  
832 mapped to the HA412-HOv2 reference genome, and a SNP data set was generated using  
833 a pipeline similar to that described above (SI Appendix, Supplementary Information  
834 Text). We then used the SNP data set to identify introgressions from the primary and  
835 secondary germplasm in all accessions using the software package PCAdmix (Brisbin et  
836 al. 2013), a principal component analysis-based algorithm for inferring local ancestry  
837 along chromosomes in admixed genomes. Prior to the PCAdmix analysis, the VCF was  
838 filtered to retain only bi-allelic SNPs in the 50% tranche from GATK Variant Quality  
839 Score Recalibration with genotyping rate > 90%, and the SNPs were phased using Beagle  
840 5.1 (Browning et al. 2018) for each species separately. No pruning was set in the  
841 PCAdmix analyses.

842

843 The identified introgressed regions from wild *annuus* and secondary germplasm were  
844 used to call introgression variants in the SAM population. We assessed the presence or



845 absence of introgressions in 1kb non-overlapping windows across the genome of each  
846 sample in the SAM population. Introgression variants were subsequently filtered for  
847 minor allele frequency  $\geq 3\%$ .

848

849 For the phenotypic analyses, we employed data for 16 traits that were generated as part of  
850 a common garden study carried out in 2011 at three locations: Watkinsville, GA and  
851 Ames, IA in the USA and Vancouver, BC, in Canada (Mandel et al. 2013; Nambeeson et  
852 al. 2015; Lee et al. 2022). To identify associations between introgression variants and the  
853 phenotypic traits, a genome wide association (GWA) analysis was carried out using  
854 EMMAX (Kang et al. 2010). Population structure was corrected by the first three  
855 principal components of the LD-pruned SNP dataset (calculated with PLINK --indep-  
856 pairphase 50kb 50 0.2; Purcell et al. 2007). To correct for relatedness between samples in  
857 the GWA analysis, the SNP dataset was used to estimate a kinship matrix by EMMAX.

858

859 To identify significantly associated introgression markers and the direction of the  
860 introgression on phenotypic data, we generated double-sided Manhattan plots, in which  
861 introgression markers that increase or decrease trait values were shown with  $-\log_{10}(P$ -  
862 value) and  $\log_{10}(P$ -value), respectively. To avoid false-positive associations, Bonferroni  
863 correction was used as the threshold of significant association.

864

865 To further explore the signature of linkage drag on phenotypic data, a ridge regression  
866 model was used to estimate the effect of each introgression variant on a given trait with  
867 the mixed.solve function in R package rrBLUP version 4.6.1 (Endelman et al. 2011). The  
868 average effect size of introgressions for each trait was compared to a null distribution.  
869 We assessed the significance of an introgression variant's effect on phenotype variation  
870 by testing whether the observed impact size of introgressions was either larger than the  
871 95th percentile of the tail of the null distribution (significantly larger) or smaller than the  
872 5th percentile of the tail of the null distribution (significantly smaller). To construct the  
873 null distribution, 10,000 introgression effect size estimates for each trait were generated  
874 by shuffling introgression variants between samples and calculating the average effect  
875 size of introgressions. We further compared the effect size of introgression on each trait  
876 for primary versus secondary germplasm donors.

877

878 A linear model ( $Y \sim X$ ) was fit to evaluate the effects of frequency on the phenotypic  
879 impact of introgression, where  $Y$  is a vector of introgression effect and  $X$  is a vector of  
880 introgression frequency. The beta coefficient of  $X$  can therefore represent the  
881 contribution of frequency to the direction and effect size of introgression variants.

882

883 **Data Availability.** Genome assemblies and annotations are available at  
884 <https://www.heliagene.org/> and <https://sunflowergenome.org/> for the PacBio and Illumina  
885 genomes, respectively. Raw sequences are deposited in NCBI (Table S8). Custom scripts  
886 for the analyses are available upon request and will be sent to GitHub before publication.

887

888 **ACKNOWLEDGMENTS.** We thank NRGene and DoveTail Genomics for assembly  
889 and scaffolding, respectively, of the HA412-HOv2 genome, Greg Baute for comments  
890 and discussions during the project. This work was supported by the International

891 Consortium of Sunflower Genomics, a China Scholarship Council scholarship (no.  
892 201506380099) to KH, a grant from the NSF Plant Genome Program (IOS-1444522 to  
893 JMB and LHR), and a National Science and Engineering Discovery Grant to LHR. We  
894 are grateful to Compute Canada and the GenoToul bioinformatics platform of Toulouse-  
895 Occitanie for providing computing and storage resources.

896

897

## 898 **References**

899

- 900 Audano PA, Sulovari A, Graves-Lindsay TA, et al. Characterizing the major structural  
901 variant alleles of the human genome. *Cell*. 2019;176(3):663-675.e19.  
902 doi:10.1016/j.cell.2018.12.019
- 903 Baack EJ, Whitney KD, Rieseberg LH. Hybridization and genome size evolution: timing  
904 and magnitude of nuclear DNA content increases in *Helianthus* homoploid hybrid  
905 species. *New Phytol*. 2005;167(2):623-630. doi:10.1111/j.1469-8137.2005.01433.x
- 906 Baack EJ, Sapir Y, Chapman MA, Burke JM, Rieseberg LH. Selection on domestication  
907 traits and quantitative trait loci in crop-wild sunflower hybrids. *Mol Ecol*.  
908 2008;17(2):666-677. doi:10.1111/j.1365-294X.2007.03596.x
- 909 Badouin H, Gouzy J, Grassa CJ, et al. The sunflower genome provides insights into oil  
910 metabolism, flowering and Asterid evolution. *Nature*. 2017;546(7656):148-152.  
911 doi:10.1038/nature22380
- 912 Barker MS, Li Z, Kidder TI, et al. Most Compositae (Asteraceae) are descendants of a  
913 paleohexaploid and all share a paleotetraploid ancestor with the Calyceraceae. *Am J*  
914 *Bot*. 2016;103(7):1203-1211. doi:10.3732/ajb.1600113
- 915 Barker MS, Kane NC, Matvienko M, et al. Multiple paleopolyploidizations during the  
916 evolution of the Compositae reveal parallel patterns of duplicate gene retention after  
917 millions of years. *Mol Biol Evol*. 2008;25(11):2445-2455.  
918 doi:10.1093/molbev/msn187
- 919 Baute GJ, Kane NC, Grassa CJ, Lai Z, Rieseberg LH. Genome scans reveal candidate  
920 domestication and improvement genes in cultivated sunflower, as well as post-  
921 domestication introgression with wild relatives. *New Phytol*. 2015;206(2):830-838.  
922 doi:10.1111/nph.13255
- 923 Bayer PE, Golicz AA, Scheben A, Batley J, Edwards D. Plant pan-genomes are the new  
924 reference. *Nat Plants*. 2020;6(8):914-920. doi:10.1038/s41477-020-0733-0
- 925 Brazier T, Glémin S. Diversity and determinants of recombination landscapes in  
926 flowering plants. *bioRxiv* 2022.03.10.483889 (2022).  
927 doi:10.1101/2022.03.10.483889
- 928 Brisbin A, Bryc K, Byrnes J, et al. PCAdmix: principal components-based assignment of  
929 ancestry along each chromosome in individuals with admixed ancestry from two or  
930 more populations. *Hum Biol*. 2012;84(4):343-364. doi:10.3378/027.084.0401
- 931 Burton JN, Adey A, Patwardhan RP, Qiu R, Kitzman JO, Shendure J. Chromosome-scale  
932 scaffolding of de novo genome assemblies based on chromatin interactions. *Nat*  
933 *Biotechnol*. 2013;31(12):1119-1125. doi:10.1038/nbt.2727
- 934 Chakraborty M, Emerson JJ, Macdonald SJ, Long AD. Structural variants exhibit  
935 widespread allelic heterogeneity and shape variation in complex traits. *Nat*

- 936 Commun. 2019;10(1):4872. Published 2019 Oct 25. doi:10.1038/s41467-019-  
937 12884-1
- 938 Chitwood-Brown J, Vallad GE, Lee TG, Hutton SF. Characterization and elimination of  
939 linkage-drag associated with Fusarium wilt race 3 resistance genes. *Theor Appl*  
940 *Genet.* 2021;134(7):2129-2140. doi:10.1007/s00122-021-03810-5
- 941 Cingolani P, Platts A, Wang le L, et al. A program for annotating and predicting the  
942 effects of single nucleotide polymorphisms, SnpEff: SNPs in the genome of  
943 *Drosophila melanogaster* strain w1118; iso-2; iso-3. *Fly (Austin)*. 2012;6(2):80-92.  
944 doi:10.4161/fly.19695
- 945 Della Coletta R, Qiu Y, Ou S, Hufford MB, Hirsch CN. How the pan-genome is changing  
946 crop genomics and improvement. *Genome Biol.* 2021;22(1):3. Published 2021 Jan  
947 4. doi:10.1186/s13059-020-02224-8
- 948 Danecek P, Auton A, Abecasis G, Albers CA, Banks E, DePristo MA, Handsaker RE,  
949 Lunter G, Marth GT, Sherry ST, McVean G, Durbin R; 1000 Genomes Project  
950 Analysis Group. The variant call format and VCFtools. *Bioinformatics.*  
951 2011;27(15):2156-8. doi: 10.1093/bioinformatics/btr330
- 952 Danecek P, Bonfield JK, Liddle J, et al. Twelve years of SAMtools and BCFtools.  
953 *Gigascience.* 2021;10(2):giab008. doi:10.1093/gigascience/giab008
- 954 Darwin C. *On the origin of species by means of natural selection, or, The preservation of*  
955 *favoured races in the struggle for life.* London: J. Murray. 1859.
- 956 Dempewolf H, Baute G, Anderson J, et al. Past and future use of wild relatives in crop  
957 breeding. *Crop Sci.* 2017;57(3):1070–1082. doi:10.2135/cropsci2016.10.0885
- 958 Diamond J. *Guns, Germs, and Steel: The Fates of Human Societies.* WW Norton &  
959 Company. 1997.
- 960 Diamond J. Evolution, consequences and future of plant and animal domestication.  
961 *Nature.* 2002;418(6898):700-707. doi:10.1038/nature01019
- 962 Dobzhansky T. Nothing in biology makes sense except in the light of evolution.  
963 *American Biology Teacher.* 1973;35(3):125–129. doi:10.2307/4444260
- 964 Duriez P, Vautrin S, Auriac MC, et al. A receptor-like kinase enhances sunflower  
965 resistance to *Orobanche cumana*. *Nat Plants.* 2019;5(12):1211-1215.  
966 doi:10.1038/s41477-019-0556-z
- 967 Endelman JB. Ridge regression and other kernels for genomic selection with R Package  
968 rrBLUP. *The Plant Genome.* 2011;4(3):250-255.  
969 doi.org/10.3835/plantgenome2011.08.0024
- 970 Evans LT. *Crop evolution, Adaptation and Yield.* New York: Cambridge. 1993.
- 971 Falush D., Stephens M, Pritchard, JK. Inference of population structure: Extensions to  
972 linked loci and correlated allele frequencies. *Genetics.* 2003;164:1567-1587. doi:  
973 10.3410/f.1015548.197423
- 974 Frary A, Fulton TM, Zamir D, Tanksley SD. Advanced backcross QTL analysis of a  
975 *Lycopersicon esculentum* x *L. pennellii* cross and identification of possible  
976 orthologs in the Solanaceae. *Theor Appl Genet.* 2004;108(3):485-496.  
977 doi:10.1007/s00122-003-1422-x
- 978 Friedrichs S, Takasu Y, Kearns P, et al. An overview of regulatory approaches to genome  
979 editing in agriculture. *Biotechnology Research and Innovation.* 2019;3(2):208-220.  
980 doi:10.1016/j.biori.2019.07.001.

- 981 Gage JL, Vaillancourt B, Hamilton JP, et al. Multiple maize reference genomes impact  
982 the identification of variants by genome-wide association study in a diverse inbred  
983 panel. *Plant Genome*. 2019;12(2):10.3835/plantgenome2018.09.0069.  
984 doi:10.3835/plantgenome2018.09.0069
- 985 Gentzbittel L, Mestries E, Mouzeyar S, et al. A composite map of expressed sequences  
986 and phenotypic traits of the sunflower (*Helianthus annuus* L.) genome. *Theor Appl*  
987 *Genet*. 1999;99:218-234. doi:10.1007/s001220051228
- 988 Goel M, Sun H, Jiao WB, Schneeberger K. SyRI: finding genomic rearrangements and  
989 local sequence differences from whole-genome assemblies. *Genome Biol*.  
990 2019;20(1):277. Published 2019 Dec 16. doi:10.1186/s13059-019-1911-0
- 991 Guerra D, Morcia C, Badeck F, et al. Extensive allele mining discovers novel genetic  
992 diversity in the loci controlling frost tolerance in barley. *Theor Appl Genet*.  
993 2022;135(2):553-569. doi:10.1007/s00122-021-03985-x
- 994 Gur A, Zamir D. Unused natural variation can lift yield barriers in plant breeding. *PLoS*  
995 *Biol*. 2004;2(10):e245. doi:10.1371/journal.pbio.0020245
- 996 Hajjar H, Hodgkin T. The use of wild relatives in crop improvement: a survey of  
997 developments over the last 20 years. *Euphytica*. 2007;156:1–13.  
998 doi:10.1007/s10681-007-9363-0
- 999 Hao M, Zhang L, Ning S, et al. The resurgence of introgression breeding, as exemplified  
1000 in wheat improvement. *Front Plant Sci*. 2020;11:252. doi:10.3389/fpls.2020.00252
- 1001 Harlan JR. Our vanishing genetic resources. *Science*. 1975;188(4188):617-621.  
1002 doi:10.1126/science.188.4188.617
- 1003 Harlan JR, de Wet JM. Toward a rational classification of cultivated plants. *Taxon*.  
1004 1971;20(4):509–517. doi:10.2307/1218252
- 1005 Huang K, Ostevik KL, Elphinstone C, et al. Mutation load in sunflower inversions is  
1006 negatively correlated with inversion heterozygosity. *Mol Biol Evol*. 2022;msac101.  
1007 doi:10.1093/molbev/msac101
- 1008 Hübner S, Bercovich N, Todesco M, et al. Sunflower pan-genome analysis shows that  
1009 hybridization altered gene content and disease resistance. *Nat Plants*. 2019;5(1):54-  
1010 62. doi:10.1038/s41477-018-0329-0
- 1011 Hübner S, Kantar MB. Tapping diversity from the wild: from sampling to  
1012 implementation. *Front Plant Sci*. 2021;12:626565. doi:10.3389/fpls.2021.626565
- 1013 Hufford MB, Seetharam AS, Woodhouse MR, et al. *De novo* assembly, annotation, and  
1014 comparative analysis of 26 diverse maize genomes. *Science*. 2021;373(6555):655-  
1015 662. doi:10.1126/science.abg5289
- 1016 Jannink JL, Lorenz AJ, Iwata H. Genomic selection in plant breeding: from theory to  
1017 practice. *Brief Funct Genomics*. 2010;9(2):166-177. doi:10.1093/bfgp/elq001
- 1018 Kang HM, Sul JH, Service SK, et al. Variance component model to account for sample  
1019 structure in genome-wide association studies. *Nat Genet*. 2010;42(4):348-354.  
1020 doi:10.1038/ng.548
- 1021 Kawall K. New Possibilities on the Horizon: Genome Editing Makes the Whole Genome  
1022 Accessible for Changes. *Front Plant Sci*. 2019;10:525. Published 2019 Apr 24.  
1023 doi:10.3389/fpls.2019.00525
- 1024 Khoury CK, Brush S, Costich DE, et al. Crop genetic erosion: understanding and  
1025 responding to loss of crop diversity. *New Phytol*. 2022;233(1):84-118.  
1026 doi:10.1111/nph.17733

- 1027 Koren S, Walenz BP, Berlin K, Miller JR, Bergman NH, Phillippy AM. Canu: scalable  
1028 and accurate long-read assembly via adaptive k-mer weighting and repeat  
1029 separation. *Genome Res.* 2017;27(5):722-736. doi:10.1101/gr.215087.116
- 1030 Kuroha T, Nagai K, Gamuyao R, et al. Ethylene-gibberellin signaling underlies  
1031 adaptation of rice to periodic flooding. *Science.* 2018;361(6398):181-186.  
1032 doi:10.1126/science.aat1577
- 1033 Leclercq P. Une sterilité mâle cytoplasmique chez le tournesol. *Ann. Amel. Plantes.*  
1034 1969;19:99-106.
- 1035 Lee JS, Jahani M, Huang K, et al. Expression complementation of gene presence/absence  
1036 polymorphisms in hybrids contributes importantly to heterosis in sunflower. *J Adv*  
1037 *Res.* 2022. Doi:10.1016/j.jare.2022.04.008.
- 1038 Lei L, Goltsman E, Goodstein D, Wu GA, Rokhsar DS, Vogel JP. Plant pan-genomics  
1039 comes of age. *Annu Rev Plant Biol.* 2021;72:411-435. doi:10.1146/annurev-  
1040 arplant-080720-105454
- 1041 Mandel JR, Dechaine JM, Marek LF, Burke JM. Genetic diversity and population  
1042 structure in cultivated sunflower and a comparison to its wild progenitor,  
1043 *Helianthus annuus* L. *Theor Appl Genet.* 2011;123(5):693-704.  
1044 doi:10.1007/s00122-011-1619-3
- 1045 Mandel JR, Nambesan S, Bowers JE, et al. Association mapping and the genomic  
1046 consequences of selection in sunflower. *PLoS Genet.* 2013;9(3):e1003378.  
1047 doi:10.1371/journal.pgen.1003378
- 1048 Manni M, Berkeley MR, Seppey M, Simão FA, Zdobnov EM. BUSCO Update: novel and  
1049 streamlined workflows along with broader and deeper phylogenetic coverage for  
1050 scoring of eukaryotic, prokaryotic, and viral genomes. *Mol Biol Evol.*  
1051 2021;38(10):4647-4654. doi:10.1093/molbev/msab199
- 1052 Marçais G, Delcher AL, Phillippy AM, Coston R, Salzberg SL, Zimin A. MUMmer4: A  
1053 fast and versatile genome alignment system. *PLoS Comput Biol.*  
1054 2018;14(1):e1005944. Published 2018 Jan 26. doi:10.1371/journal.pcbi.1005944
- 1055 Mayjonade B, Gouzy J, Donnadieu C, et al. Extraction of high-molecular-weight genomic  
1056 DNA for long-read sequencing of single molecules. *Biotechniques.* 2016;61(4):203-  
1057 205. Published 2016 Oct 1. doi:10.2144/000114460
- 1058 Mayrose M, Kane NC, Mayrose I, Dlugosch KM, Rieseberg LH. Increased growth in  
1059 sunflower correlates with reduced defences and altered gene expression in response  
1060 to biotic and abiotic stress. *Mol Ecol.* 2011;20(22):4683-4694. doi:10.1111/j.1365-  
1061 294X.2011.05301.x
- 1062 McCouch S, Baute GJ, Bradeen J, et al. Agriculture: Feeding the future. *Nature.*  
1063 2013;499(7456):23-24. doi:10.1038/499023a
- 1064 Moyers BT, Morrell PL, McKay JK. Genetic costs of domestication and improvement. *J*  
1065 *Hered.* 2018;109(2):103-116. doi:10.1093/jhered/esx069
- 1066 Moyle LC, Graham EB. Genetics of hybrid incompatibility between *Lycopersicon*  
1067 *esculentum* and *L. hirsutum*. *Genetics.* 2005;169(1):355-373.  
1068 doi:10.1534/genetics.104.029546
- 1069 Nambesan SU, Mandel JR, Bowers JE, et al. Association mapping in sunflower  
1070 (*Helianthus annuus* L.) reveals independent control of apical vs. basal branching.  
1071 *BMC Plant Biol.* 2015;15:84. doi:10.1186/s12870-015-0458-9

- 1072 Ou S, Su W, Liao Y, et al. Benchmarking transposable element annotation methods for  
1073 creation of a streamlined, comprehensive pipeline. *Genome Biol.* 2019;20(1):275.  
1074 Published 2019 Dec 16. doi:10.1186/s13059-019-1905-y
- 1075 Owens GL, Baute GJ, Hubner S, Rieseberg LH. Genomic sequence and copy number  
1076 evolution during hybrid crop development in sunflowers. *Evol Appl.*  
1077 2018;12(1):54-65. Published 2018 Feb 20. doi:10.1111/eva.12603
- 1078 Page AJ, Cummins CA, Hunt M, et al. Roary: rapid large-scale prokaryote pan genome  
1079 analysis. *Bioinformatics.* 2015;31(22):3691-3693.  
1080 doi:10.1093/bioinformatics/btv421
- 1081 Plucknett DL, Smith NJH, Williams JT, Murthi AN. *Gene banks and the world's*  
1082 *food*. Princeton, NJ, USA: Princeton University Press. 1987.
- 1083 PricewaterhouseCoopers. Crop wild relatives: A valuable resource for crop development.  
1084 2013. <https://pwc.blogs.com/files/pwc-seed-bank-analysis-for-msb-0713.pdf>
- 1085 Pritchard, JK, Stephens M, Donnelly P. Inference of population structure using multilocus  
1086 genotype data. *Genetics*, 2000;155:945-959. doi:10.1093/genetics/155.2.945
- 1087 Purcell S, Neale B, Todd-Brown K, et al. PLINK: a tool set for whole-genome association  
1088 and population-based linkage analyses. *Am J Hum Genet.* 2007;81(3):559-575.  
1089 doi:10.1086/519795
- 1090 Purugganan MD. Evolutionary Insights into the Nature of Plant Domestication. *Curr Biol.*  
1091 2019;29(14):R705-R714. doi:10.1016/j.cub.2019.05.053
- 1092 Putnam NH, O'Connell BL, Stites JC, et al. Chromosome-scale shotgun assembly using  
1093 an in vitro method for long-range linkage. *Genome Res.* 2016;26(3):342-350.  
1094 doi:10.1101/gr.193474.115.
- 1095 Raymond O, Gouzy J, Just J, et al. The Rosa genome provides new insights into the  
1096 domestication of modern roses. *Nat Genet.* 2018;50(6):772-777.  
1097 doi:10.1038/s41588-018-0110-3
- 1098 Renaut S, Rieseberg LH. The accumulation of deleterious mutations as a consequence of  
1099 domestication and improvement in sunflowers and other Compositae crops. *Mol*  
1100 *Biol Evol.* 2015;32(9):2273-2283. doi:10.1093/molbev/msv106
- 1101 Rodgers-Melnick E, Bradbury PJ, Elshire RJ, et al. Recombination in diverse maize is  
1102 stable, predictable, and associated with genetic load. *Proc Natl Acad Sci U S A.*  
1103 2015;112(12):3823-3828. doi:10.1073/pnas.1413864112
- 1104 Sallet, E., J. Gouzy, T. Schiex. EuGene: An Automated Integrative Gene Finder for  
1105 Eukaryotes and Prokaryotes. *Methods Mol Biol.* 2019;1962:97-120. doi:  
1106 10.1007/978-1-4939-9173-0\_6.
- 1107 Seiler GJ, Qi LL, Marek LF (2017), Utilization of sunflower crop wild relatives for  
1108 cultivated sunflower improvement. *Crop Science.* 2017;57:1083.  
1109 1101. doi:10.2135/cropsci2016.10.0856
- 1110 Sims LE, Price HJ. Nuclear DNA content variation in *Helianthus* (Asteraceae), *Am J Bot.*  
1111 1985;72(8):1213-1219. doi:10.1002/j.1537-2197.1985.tb08374.x
- 1112 Smedegaard-Petersen V, Tolstrup K. The limiting effect of disease resistance on yield.  
1113 *Annu Rev Phytopathol.* 1985;23:475-490.  
1114 doi:10.1146/annurev.py.23.090185.002355
- 1115 Smith O, Nicholson WV, Kistler L, Mace E, Clapham A, Rose P, Stevens C, Ware R,  
1116 Samavedam S, Barker G, Jordan D, Fuller DQ, Allaby RG. A domestication history

- 1117 of dynamic adaptation and genomic deterioration in *Sorghum*. *Nat Plants*.  
1118 2019;5(4):369-379. doi: 10.1038/s41477-019-0397-9.
- 1119 Tang S, Knapp SJ. Microsatellites uncover extraordinary diversity in native American  
1120 land races and wild populations of cultivated sunflower. *Theor Appl Genet*.  
1121 2003;106(6):990-1003. doi:10.1007/s00122-002-1127-6
- 1122 Tang H, Zhang X, Miao C, et al. ALLMAPS: robust scaffold ordering based on multiple  
1123 maps. *Genome Biol*. 2015;16(1):3. doi:10.1186/s13059-014-0573-1
- 1124 Tanksley SD, McCouch SR. Seed banks and molecular maps: unlocking genetic potential  
1125 from the wild. *Science*. 1997;277(5329):1063-1066.  
1126 doi:10.1126/science.277.5329.1063
- 1127 Tao D, McNally KL, Koide Y, Matsubara K. Editorial: Reproductive barriers and gene  
1128 introgression in rice species. *Front Plant Sci*. 2021;12:699761.  
1129 doi:10.3389/fpls.2021.699761
- 1130 Temme AA, Kerr KL, Masalia RR, Burke JM, Donovan LA. Key Traits and Genes  
1131 Associate with Salinity Tolerance Independent from Vigor in Cultivated Sunflower.  
1132 *Plant Physiol*. 2020;184(2):865-880. doi:10.1104/pp.20.00873
- 1133 Terzić S, Boniface M-C, Marek L et al. Gene banks for wild and cultivated sunflower  
1134 genetic resources. *OCL - Oilseeds fats Crops Lipids*. 2020;27:9.  
1135 doi:10.1051/ocl/2020004
- 1136 Thudi M, Palakurthi R, Schnable JC, et al. Genomic resources in plant breeding for  
1137 sustainable agriculture. *J Plant Physiol*. 2021;257:153351.  
1138 doi:10.1016/j.jplph.2020.153351
- 1139 Todesco M, Owens GL, Bercovich N, et al. Massive haplotypes underlie ecotypic  
1140 differentiation in sunflowers. *Nature*. 2020;584(7822):602-607.  
1141 doi:10.1038/s41586-020-2467-6
- 1142 Vear F. Changes in sunflower breeding over the last fifty years. *OCL - Oilseeds fats*  
1143 *Crops Lipids*. 2016;23(2):D202. doi:10.1051/ocl/2016006
- 1144 Voss-Fels KP, Qian L, Parra-Londono S, et al. Linkage drag constrains the roots of  
1145 modern wheat. *Plant Cell Environ*. 2017;40(5):717-725. doi:10.1111/pce.12888
- 1146 Wang L, Beissinger TM, Lorant A, Ross-Ibarra C, Ross-Ibarra J, Hufford MB. The  
1147 interplay of demography and selection during maize domestication and expansion.  
1148 *Genome Biol*. 2017;18(1):215. doi:10.1186/s13059-017-1346-4
- 1149 Warschefsky E, Penmetsa RV, Cook DR, von Wettberg EJ. Back to the wilds: tapping  
1150 evolutionary adaptations for resilient crops through systematic hybridization with  
1151 crop wild relatives. *Am J Bot*. 2014;101(10):1791-1800. doi:10.3732/ajb.1400116
- 1152 Wellstein C, Poschlod P, Gohlke A, et al. Effects of extreme drought on specific leaf area  
1153 of grassland species: A meta-analysis of experimental studies in temperate and sub-  
1154 Mediterranean systems. *Glob Chang Biol*. 2017;23(6):2473-2481.  
1155 doi:10.1111/gcb.13662
- 1156 Wu TD, Watanabe CK. GMAP: a genomic mapping and alignment program for mRNA  
1157 and EST sequences. *Bioinformatics*. 2005;21(9):1859-1875.  
1158 doi:10.1093/bioinformatics/bti310
- 1159 Young ND, Tanksley SD. RFLP analysis of the size of chromosomal segments retained  
1160 around the Tm-2 locus of tomato during backcross breeding. *Theor Appl Genet*.  
1161 1989;77(3):353-359. doi:10.1007/BF00305828

1162 Zamir D. Improving plant breeding with exotic genetic libraries. *Nat Rev Genet.*  
1163 2001;2(12):983-989. doi:10.1038/35103590  
1164
